# Supplementary material for: Bromodomain proteins regulate human cytomegalovirus latency and reactivation allowing epigenetic therapeutic intervention
Source: PubMed Central journal article supplement — Proc Natl Acad Sci U S A. 2021 Feb 22;118(9):e2023025118. doi: 10.1073/pnas.2023025118 (PMC7936348; doi:10.1073/pnas.2023025118), 2021-02-22
Supplement: pnas.2023025118.sapp.pdf [file pnas.2023025118.sapp.pdf]

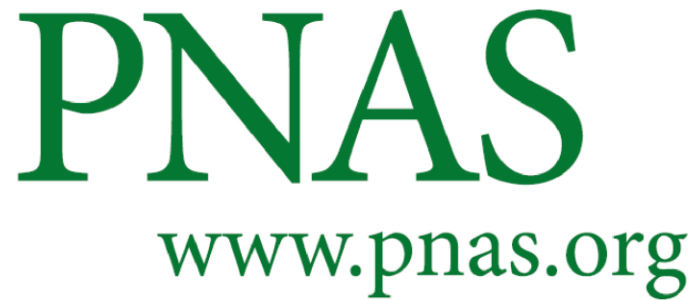

Supplementary Information for

## **Bromodomain proteins regulate human cytomegalovirus latency and reactivation allowing epigenetic therapeutic intervention**

Ian J. Groves<sup>a\*</sup>, Sarah E. Jackson<sup>a</sup>, Emma L. Poole<sup>a</sup>, Aharon Nachshon<sup>b</sup>, Batsheva Rozman<sup>b</sup>, Michal Schwartz<sup>b</sup>, Rab K. Prinjha<sup>c</sup>, David F. Tough<sup>c</sup>, John H. Sinclair<sup>a1</sup>, Mark R. Wills<sup>a\*1</sup>

<sup>a</sup>Cambridge Institute of Therapeutic Immunology and Infectious Disease and Department of Medicine, University of Cambridge School of Clinical Medicine, Cambridge Biomedical Campus, Cambridge, UK, CB2 2QQ.

<sup>b</sup>Department of Molecular Genetics, Weizmann Institute of Science, Rehovot, Israel

<sup>c</sup>Adaptive Immunity Research Unit, GlaxoSmithKline Medicines Research Centre, Stevenage, UK

<sup>1</sup>Authors contributed equally

\*Corresponding authors: Ian J Groves, Mark R Wills.

**Email:** [ijg25@cam.ac.uk](mailto:ijg25@cam.ac.uk), [mrw1004@cam.ac.uk](mailto:mrw1004@cam.ac.uk)

### **This PDF file includes:**

Supplementary Methods

Figures S1 to S20

Tables S1 to S4

SI References

## Supplementary Methods

**Cell culture.** Peripheral blood mononuclear cells (PBMCs) were isolated from either peripheral blood or apheresis cones (NHS Blood and Transplant) by density gradient centrifugation (Lymphoprep, Axis-shield, Alere Ltd). HCMV serostatus was determined using serum from the sample and IgG levels analysed using an IgG enzyme-linked immunosorbent (EIA) assay (Captia HCMV IgG, Trinity Biotech) following manufacturer's instructions. CD14<sup>+</sup> monocytes were then isolated by magnetic-activated cell sorting (MACS, Miltenyi Biotec) as per manufacturer's instructions using anti-CD14 magnetic beads, resulting cells being plated on plastic ware ( $5 \times 10^5$  per  $\text{cm}^2$ ) for 3h in phosphate buffered saline (PBS) before washing twice and addition of X-Vivo-15 with 2mM L-glutamine (Lonza). Human foetal foreskin fibroblasts (HFFF) (ECACC, 86031405) were passaged in Dulbecco's modified Eagle's medium (DMEM) and THP-1 cells (ECACC, 88081201) in RPMI 1640 medium (Sigma), both supplemented with 10% heat-inactivated foetal bovine serum (FBS) (PAN Biotech), penicillin (100 U/ml) and streptomycin (100  $\mu\text{g}/\text{ml}$ ) (Sigma). All cells were incubated at 37 °C in a 5% CO<sub>2</sub> environment. Differentiation of CD14<sup>+</sup> monocytes to macrophages was achieved with either: phorbol 12-myristate 13-acetate (PMA, 20nM) (Sigma)(1); or macrophage colony-stimulating factor (M-CSF, 20ng/ml) (Miltenyi Biotec) and interleukin-1 $\beta$  (IL-1 $\beta$ , 10ng/ml) (Miltenyi Biotec) for 4-days. Differentiation to mature DCs employed granulocyte-macrophage colony-stimulating factor (GM-CSF, 1,000 U/ml) (Miltenyi Biotec) and interleukin-4 (IL-4, 1,000 U/ml) (Miltenyi Biotec) for 5-days before the addition of lipopolysaccharide (LPS, 500 ng/ml) (Invivogen) for at least 2-days. THP-1-MIEP-eGFP cells (a gift from M. Van Loock, Johnson & Johnson (from which an isolated integrated HCMV MIEP expresses enhanced GFP upon differentiation)(2) and Kasumi-3 myeloblastic cells(3,4) were grown in RPMI 1640 medium (Sigma) supplemented with 20% heat-inactivated foetal bovine serum (FBS) (PAN Biotech), penicillin (100 U/ml) and streptomycin (100  $\mu\text{g}/\text{ml}$ ) (Sigma). The production and culture of human induced pluripotent stem (iPS) C2 cells has been described at length elsewhere(5). All cells were incubated at 37 °C in a 5% CO<sub>2</sub> environment and differentiation was achieved with PMA treatment (100nM; Sigma) for 48h.

**Viruses and HCMV latent infection.** TB40e-IE86-eYFP expresses the immediate early IE86 protein fused to enhanced YFP(6) and was derived with BAC vector (BAC4) insertion at US2-6 from a low passage wild type strain of TB40e(7). Due to the absence of a full complement of viral immune evasion genes in TB40e-IE86-eYFP, all experiments concerning immune analysis and requiring a fluorescent

marker were conducted with TB40e-UL32-GFP, which expresses the late protein pp150 (UL32 gene) fused to GFP(8). All viruses were a gift of Christian Sinzger (University of Ulm, Germany), have no growth deficits or attenuation and have been used previously(9). For experimental latent infection, CD14+ monocytes (pre-plated for 24 h) were incubated with virus at an MOI of ~5 (stock dependent) for 3 h at room temperature with rocking. Virus medium was then removed and cells were washed twice in PBS before replacing with X-Vivo-15 with 2mM L-glutamine and incubation for 5-days for transcriptional latency to ensue. For infection of THP-1 monocytes, cells were pre-cultured in RPMI with 2% FBS (RPMI-2) for 24 h before incubation with TB40e IE86-eYFP (MOI ~5) in suspension for 3 h with intermittent shaking. THP-1s were then washed twice in RPMI-2 medium before resuspension in RPMI-2 for 3-days for latency to establish. CD34+ cell lines were infected in suspension with HCMV TB40e IE86-eYFP at an MOI of ~5 (stock dependent) for 3 h at room temperature with agitation. Cells were washed twice in PBS before replacing medium and incubation for 3-days before treatment with compounds, DMSO (negative control) and PMA (100mM; positive control). YFP-positive cells were then counted per well and numbers normalised to PMA (set to 1).

**HCMV reactivation analyses.** CD14+ monocytes expressing fluorescent protein (green cells) after experimental infection with either TB40e-IE86-eYFP or TB40e-UL32-GFP and compound treatment were counted per well in comparison to DMSO background (negative control) and PMA (positive control) across various time courses. To determine if HCMV full reactivation had resulted, compound medium was withdrawn, cells washed and CD14+ monocytes overlaid with HFFF ( $3 \times 10^4$  per  $\text{cm}^2$ ) in 50:50 mix of X-Vivo-15:DMEM-10 for between 7 to 14-days before green plaques were then counted. For HCMV latently infected killing experiments with T-cell co-cultures, lymphocytes were washed off before HFFF overlays were established and differentiation of CD14+ monocytes was used to produce green plaques to determine the remaining numbers of latently infected cells. Treatment of TB40e-IE86-eYFP latently infected THP-1 cells was carried out for 48 h before analysis of IE gene expression through YFP analysis relative to DMSO background (negative control) and PMA (positive control) via flow cytometry.

**T-cell co-culture experiments.** PBMC isolated from peripheral blood were depleted of either CD4+, CD8+ or total CD3+ T-cells by MACS using anti-CD4, anti-CD8 or anti-CD3 direct beads (Miltenyi

Biotec), respectively, according to manufacturer's instructions with separation using an AutoMACS Pro (Miltenyi Biotec). Efficiency of depletion was determined by staining a proportion of cells with a CD3-FITC, CD4-PE, and CD8-PerCP-Cy5.5 antibody mix (BioLegend) and analysis by flow cytometry with remaining cells amounting to no more than 1% of final co-culture. Lymphocyte co-cultures for HCMV latently infected killing experiments were established at an effector to target (E:T) cell ratio of 2:1.

**HCMV lytic infection and compound treatment analysis.** Human foetal foreskin fibroblasts (HFFFs) were treated with inhibitors for 16-hours before infection with HCMV TB40e IE86-eYFP (MOI experiment dependent). After 24h, cells were fixed with paraformaldehyde and nuclei counterstained with Hoechst before the number of YFP-positive cells and level of YFP expression per cell was assessed using ArrayScan technology, as well as the number of live cells by Hoechst stain relative to DMSO (negative control). For lytic DNA replication analysis, similarly pre-treated infected cells were cultured for 72h before DNA was harvested by the method described in the main methods section.

**Epigenetic inhibitors and cytotoxicity.** Cells were treated with epigenetic inhibitors provided by GlaxoSmithKline (Epigenetics toolbox) and commercially available inhibitors (see Table S1). Dimethyl sulfoxide (DMSO) was used to dissolve all compounds (stock at 10mM) and employed within experiments as a negative control. CDK9 inhibitor, Flavopiridol (FLAV) was used at 40nM and SEC inhibitor, KL-2 was used at 10 $\mu$ M as co-treatments with stated epigenetic inhibitors. Differentiation agents (see above) were used as positive controls throughout. To determine toxicity of compounds with CD14+ monocytes, plated cells were treated with compounds (30 $\mu$ M to 30nM) across a 96h time course before dead cells were stained with SYTOX orange (5 $\mu$ M in PBS) (Thermofisher), then fixed and nuclei counter-stained with Hoechst at individual timepoints. SYTOX-positive cells were then quantified using an ArrayScan (Thermofisher). For toxicity effects with THP-1 monocytes, cells were treated with compounds (30 $\mu$ M to 30nM) for 48h before dead cells were stained with LIVE/DEAD Far Red Dead Cell stain kit as per manufacturer's instructions (Thermofisher) and then quantified on a BD Accuri C6 Plus flow cytometer (BD Biosciences).

**Quantification of HCMV transcript level.** RNA was isolated from plated CD14+ monocytes using RLT buffer and RNeasy Mini Kit (Qiagen), with quality and quantity being determined using a Nanodrop 1000

(Thermo), before elimination of genomic DNA and cDNA synthesis using 250ng of RNA with the Quantitect Reverse Transcription Kit (Qiagen). Relative transcript levels were then determined using HCMV cDNA-specific primers (Table S3) with Luna Universal SYBR Green qPCR Master Mix (NEB) as per manufacturer's instructions on an ABI StepOnePlus. Transcript levels were normalised for primer efficiency and referenced to host GAPDH transcript level using the Pfaffl method(10).

**Quantification of HCMV DNA level by qPCR.** DNA was isolated from CD14+ monocytes either experimentally or naturally infected with HCMV using a previously described method(11), with quality and quantity being determined using a Nanodrop 1000 (Thermo), before HCMV genomic DNA (gDNA) level was determined using HCMV gDNA-specific primers (Table S3) with Luna Universal SYBR Green qPCR Master Mix (NEB) as per manufacturer's instructions on an ABI StepOnePlus. DNA copy number was then determined by referencing to host GAPDH promoter copy number via the Pfaffl method(10).

**Quantification of HCMV DNA level by digital droplet PCR (ddPCR).** Latent HCMV carriage in epilepsy patients was carried out as described previously(9). Briefly, CD14+ monocytes were isolated from 20ml of heparinised peripheral blood before cells were counted and stored at -80°C before DNA extraction as per the protocol described in the main methods section. Measurement of HCMV DNA copy number was then carried out using ddPCR technology(11) whereby amplicons from PCRs using oligonucleotides directed at HCMV glycoprotein B (*gB*) or host gene *RPP30* produced in oil droplets were enumerated such that HCMV copy number could be calculated per  $1 \times 10^6$  starting CD14+ cells.

**Detection of HCMV protein expression by immunoblot.** CD14+ monocytes were lysed with Laemmli buffer (Sigma) and samples separated by sodium dodecyl sulfate-polyacrylamide gel electrophoresis (SDS-PAGE) before transfer to nitrocellulose membrane. Protein expression was then determined in comparison to  $\beta$ -actin loading control using HCMV-specific primary and horseradish peroxidase (HRP) secondary antibodies (listed in Table S4) with enhanced chemiluminescence (ECL) Prime (Sigma).

**Protein fractionation, semi-quantitative immunoblot analysis and indirect immunofluorescence.**

CD14<sup>+</sup> monocytes isolated from apheresis cones were treated with HDACi (CHR-4487, 30nM), I-BET (GSK726, 30nM), PMA (20nM) or DMSO (equivalent concentration) for 24h before protein fractions (NE, nuclear extract; CE, cytoplasmic extract) were isolated from cells using the NE-PER Nuclear and Cytoplasmic Extraction (ThermoFisher). Samples were then separated by SDS-PAGE and immunoblotted using specific antibodies for  $\beta$ -actin, histone H4 and CDK9 (Table S4) as per method in main text. The resulting bands were then semi-quantified using ImageJ densitometry compared to DMSO (set as 1), with CDK9 compared to  $\beta$ -actin and histone H4 as CE and NE loading controls, respectively. For indirect immunofluorescence analysis of CDK9 expression, equivalently compound treated CD14<sup>+</sup> monocytes were fixed with 4% paraformaldehyde before permeabilisation with 0.1% TritonX-100 in PBS before labelling with CDK9-specific primary antibody and subsequent goat anti-rabbit AlexaFluor-488 secondary (see Table 4) with Hoechst nuclear counterstain. Cells were then viewed on a Nikon Eclipse TE300 microscope using a CoolLED pE-4000 platform.

**Chromatin immunoprecipitation (ChIP) analysis.** THP-1 cells ( $1 \times 10^7$  per condition) were incubated in RPMI with 2% FBS (RPMI-2) for 24h before infection in suspension with HCMV TB40e IE86-eYFP at an MOI of 5 (equivalent on HFFF) for 3h at 37 °C in a 5% CO<sub>2</sub> environment. Cells were then washed twice in PBS before resuspension in RPMI-2 and incubation for a further 3-days. Once HCMV latency had established, cells were separated into 15cm<sup>2</sup> dishes and treated with compounds (DMSO, 30mM equivalent; CHR-4487, 30nM, GSK726, 30nM; PMA, 100nM) for 48-hours. Cells were then fixed, chromatin extracted, sonicated (using a Bioruptor Pico, Diagenode) and then immunoprecipitations carried out using the ChIP IT PBMC kit (Active Motif) as per manufacturer's instructions with ChIP validated antibodies (Table S4). Enrichment of target bound DNA was then quantified against isotype controls (set as 1) using HCMV gDNA-specific qPCR primers with ChIP verification through host control regions (Table S3).

**Fluorospot analysis of cytotoxic T cell functionality.** Fluorospot analysis of IFN- $\gamma$  release from T cells treated with epigenetic inhibitors was carried out essentially as described previously(5). Briefly, pre-coated Fluorospot plates (Mabtech AB) were seeded in triplicate with  $2 \times 10^5$  PBMC isolated by Lymphoprep centrifugation from the peripheral blood of both HCMV seropositive and negative

individuals with HCMV peptide mixes (IE72/IE86, UL83/pp65; 2µg/ml per peptide) or medium and positive control (CD3/CD28 stimulants; Mabtech AB) as well as epigenetic inhibitors: HDACi (CHR-4487, 30nM and 3nM) and I-BET (GSK726, 30nM and 3nM) in comparison to DMSO control (equivalent concentration). Plates were then incubated at 37 °C in a 5% CO<sub>2</sub> environment. After 48h, cells and medium were removed from wells and the plates developed as per the manufacturer's instructions before being read on an AID iSpot reader (Oxford Biosystems) and the IFN-γ positive spots counted using the AID EliSpot v7 software (Autoimmun Diagnostika GmbH). All data was then presented as spot forming units (SFU) per 2 x 10<sup>5</sup> PMBC.

**Myeloid cell phenotyping by flow cytometry.** CD14<sup>+</sup> monocytes isolated from apheresis cones were plated on plasticware for 24h before treatment (5 x 10<sup>6</sup> cells per condition) with HDACi (CHR-4487, 30nM and 3nM) and I-BET (GSK726, 30nM and 3nM) and PMA (20nM) in comparison to DMSO control (equivalent concentration) for a further 24h. In addition, monocytes were also treated for 6-days with GM-CSF/IL-4 (1,000 U/ml and 1,000 U/ml, respectively) for differentiation to dendritic cells (DCs) or for 4-days with M-CSF/IL-1β (20ng/ml, 10ng/ml, respectively) for differentiation to macrophage. At each endpoint, cells were removed from plasticware with cold PBS before blocking and then staining with either antibodies specific for surface markers associated with individual stages of myeloid differentiation, isotype control antibodies or unstained controls, as well as a live/dead cell stain in all cases (for reagents see Table S4). Samples were then fixed in 1% paraformaldehyde and stored in the dark at 4°C before processing on a Fortessa flow cytometer (BD Biosciences) using FACS Diva software. Samples were then analyzed using FlowJo software (Treestar, Oregon, USA), by using first a Time vs Side scatter gate, to identify the main flow of cells, then these cells were gated for single cells (Forward scatter area vs Forward scatter height), live cells (forward scatter width vs Live Dead Aqua dye), then monocyte/myeloid cells gate (Forward scatter area vs side scatter area (log scale)). Phenotype markers were analysed from this gate. The gating strategy for this phenotype panel was optimised using Fluorescence Minus One (FMO) controls in addition to the matching isotype control staining for each sample.

**Cytotoxic T cell phenotyping by flow cytometry.** To phenotype CD3<sup>+</sup>/CD4<sup>-</sup>/CD8<sup>-</sup> T cells, PBMC were isolated from peripheral blood of one HCMV seronegative and three seropositive individuals by

Lymphoprep gradient centrifugation. Cells were then stained with antibodies specific for natural killer cells (CD56), T cells (CD3/CD4/CD8 and  $\alpha/\beta$  or  $\gamma/\delta$  chains), as well as a live/dead cell stain in all cases (for reagents see Table S4), unstained controls and FMO controls were also prepared. Samples were then fixed in 1% paraformaldehyde and stored in the dark at 4°C before processing on a Fortessa flow cytometer (BD Biosciences) using FACS Diva software. Samples were then analysed using FlowJo software, by using first a Time vs Side scatter gate, to identify the main flow of cells, then these cells were gated for single cells (Forward scatter area vs Forward scatter height), live cells (forward scatter width vs Live Dead Aqua dye), then lymphocyte gate (Forward scatter area vs side scatter area (log scale)). CD4- CD8- T cells were gated from the lymphocyte gate and the expression of CD3, CD56 and TCR  $\gamma/\delta$  were assessed.

**YFP-positive cell sorting and RNA library construction.** CD14+ monocytes latently infected with HCMV-TB40e-IE86-eYFP were treated with compounds (CHR-4487 30nM; GSK726 30nM; PMA 20nM; and DMSO equivalent dilution). After 72h, cells were released from plasticware using cold PBS and 10,000 YFP-positive cells per condition (from an initial  $8 \times 10^6$ ) were FACS sorted directly into 40 $\mu$ l of lysis/binding buffer (ThermoFisher) in Ultra High Recovery 1.5ml microcentrifuge tubes (Starlab). Samples were then vortexed and snap-frozen on dry ice and stored at -80°C. Library preparation for RNA-seq was then carried out essentially as per the massively parallel single-cell RNA-seq (MARS-seq) protocol(12) using reverse transcription (RT)-indexed poly(T) primers, which leads to libraries equating to the 3' end of HCMV and host mRNA transcripts.

**Sequencing and data analysis.** RNA-Seq libraries (pooled at equimolar concentration) were performed in duplicates and sequenced using NextSeq 500 (Illumina), with read parameters - Read1: 72 cycles and Read2: 15 cycles. Alignment and analysis were done as described previously(58). The number of Unique Molecular Identifiers (UMIs) were: 1,837,419 and 4,301,957 for the DMSO samples; 1,331,708 and 1,628,589 for the PMA samples; 754,441 and 980,506 for the CHR-4487 samples; and 729,659 and 430,720 for the GSK726 samples. The differential expression analysis was done with DESeq2 (version 1.22.2) using default parameters, with the number of reads in each of the samples as an input. HCMV transcript functional and temporal expression annotations are present in Table S2. All sequencing data is available online at GSE156169.



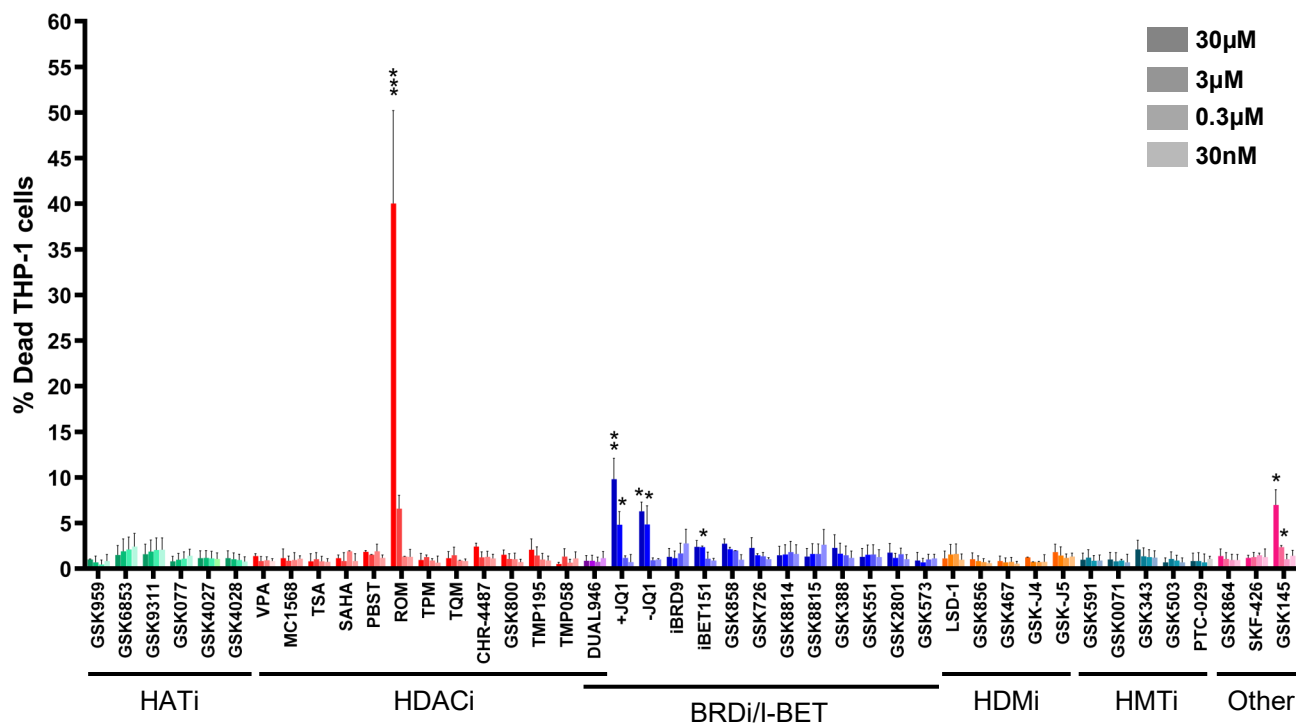

**Figure S1. Toxicity of epigenetic modifier inhibitors in the THP-1 monocytic cell line.** THP-1 monocytes were treated with inhibitors of histone acetyltransferases (HATi, green), histone deacetylases (HDACi, red), bromodomain proteins (BRDi/I-BET, blue), histone demethylases (HDMi, orange), histone methyltransferases (HMTi, teal) as well as other epigenetic modifiers (Other, pink) across a range of concentrations (30-0.3µM) for 48 hours. Cells were then stained with live/dead stain and analysed by flow cytometry in comparison to DMSO (negative control).  $n = 3$ ; bars = mean +SEM. \* $P < 0.05$ , \*\* $P < 0.01$ , \*\*\* $P < 0.001$ .

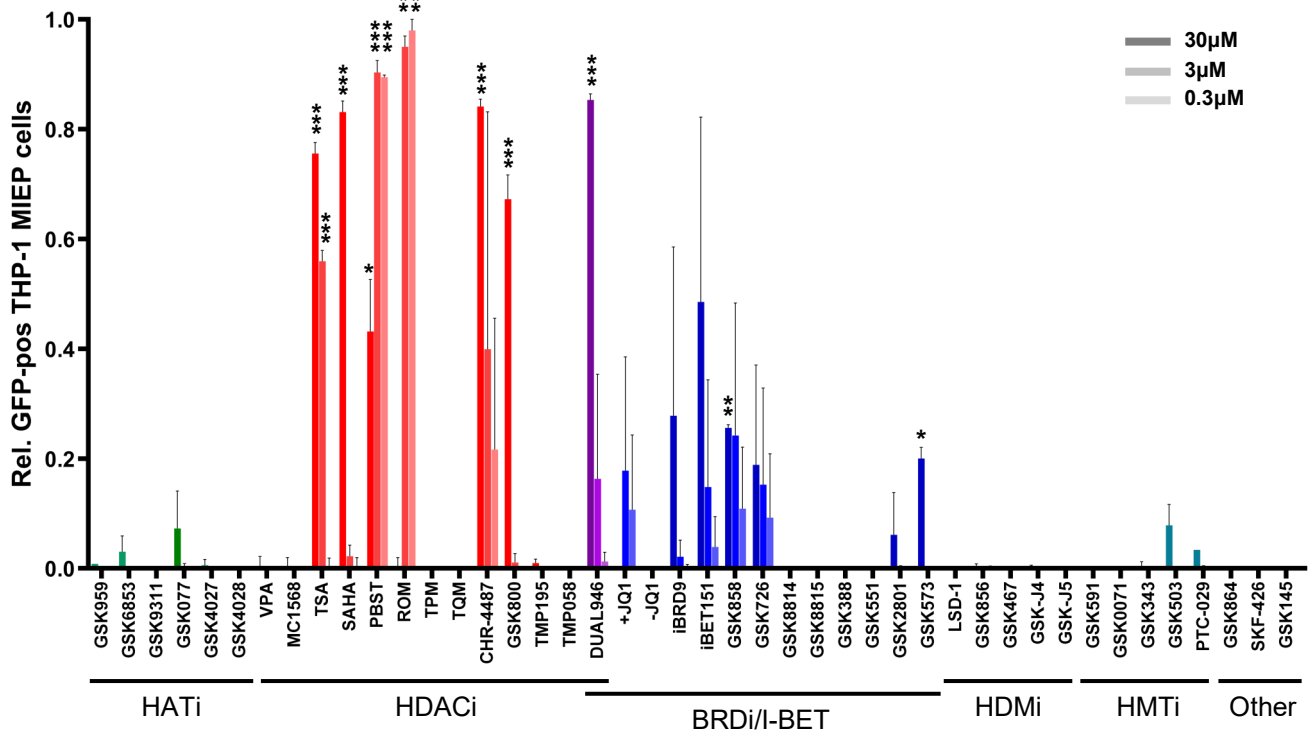

**Figure S2. HDACi and I-BETs induce high level of MIEP activity in a monocytic cell model.** THP-1 monocytes with an integrated MIEP driving GFP expression were treated with inhibitors of histone acetyltransferases (HATi, green), histone deacetylases (HDACi, red), bromodomain proteins (BRDi/I-BET, blue), histone demethylases (HDMi, orange), histone methyltransferases (HMTi, teal) as well as other epigenetic modifiers (Other, pink) across a range of concentrations (30-0.3 μM) for 48 hours. GFP expression was then analysed by flow cytometry in comparison to DMSO (negative control) and PMA (100nM, positive control; set to 1).  $n = 3$ ; bars = mean +SEM. \* $P < 0.05$ , \*\* $P < 0.01$ , \*\*\* $P < 0.001$ .

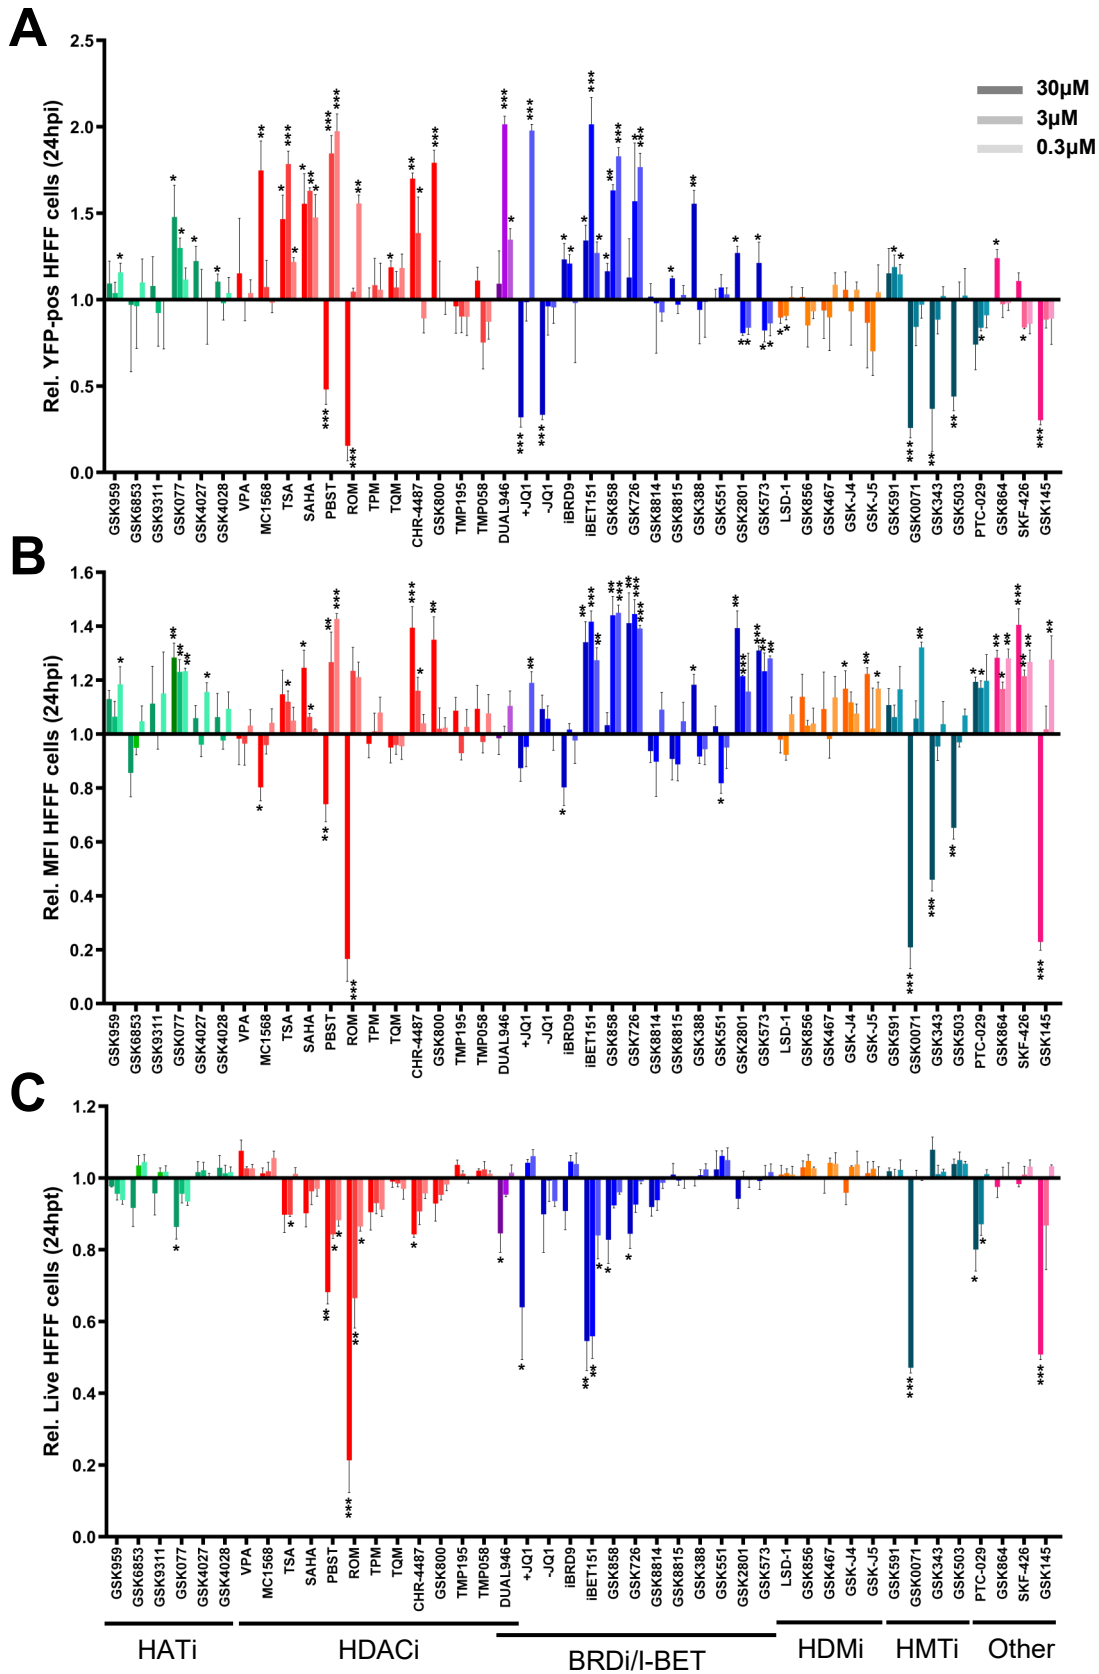

**Figure S3. HDACis and I-BETs augment IE gene expression in HCMV lytically infected fibroblasts.** Human foetal foreskin fibroblasts (HFFFs) were treated with inhibitors of histone acetyltransferases (HATi, green), histone deacetylases (HDACi, red), bromodomain proteins (BRDi/I-BET, blue), histone demethylases (HDMi, orange), histone methyltransferases (HMTi, teal) as well as other epigenetic modifiers (Other, pink) across a range of concentrations (30-0.3μM) for 16 hours before infection with HCMV TB40e IE86-eYFP (MOI 1). The number of YFP-positive cells (A) and level of YFP expression per cell (B) was then assessed at 24hpi, as well as the number of live cells by Hoechst stain (C) relative to DMSO (negative control; set to 1).  $n = 3$ ; bars = mean +SEM. MFI, mean fluorescence intensity. \* $P < 0.05$ , \*\* $P < 0.01$ , \*\*\* $P < 0.001$ .

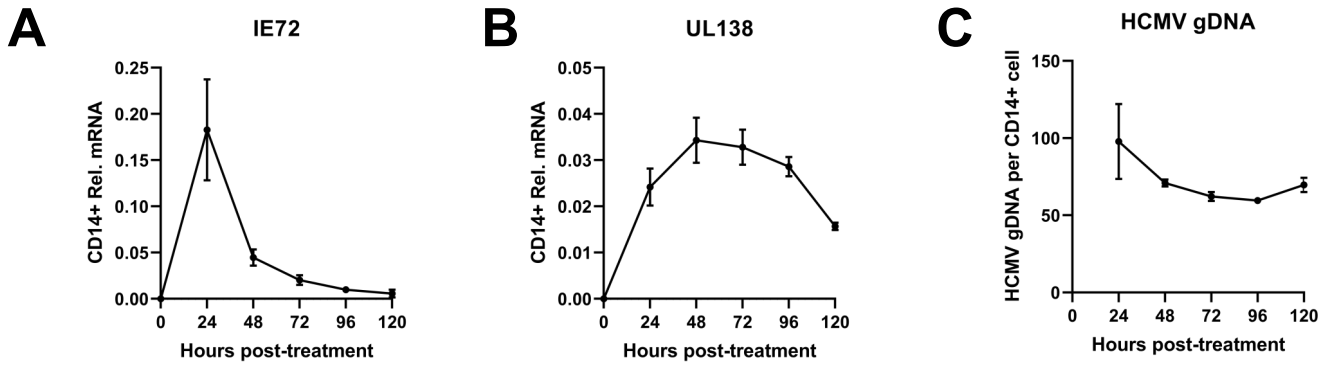

**Figure S4. Experimental infection of CD14+ monocytes with HCMV TB40e IE86-eYFP results in virus latency.** CD14+ monocytes isolated from apheresis cones were infected with HCMV TB40e IE86-eYFP with RNA and DNA isolated from cells every 24h for 5 days. RT-qPCR was then performed for virus (A) immediate early IE72 and (B) latent UL138 transcripts relative to host GAPDH and (C) HCMV genome copy number by UL44 promoter copy number relative to host GAPDH promoter.  $n = 3$ ; points = mean  $\pm$ SEM.

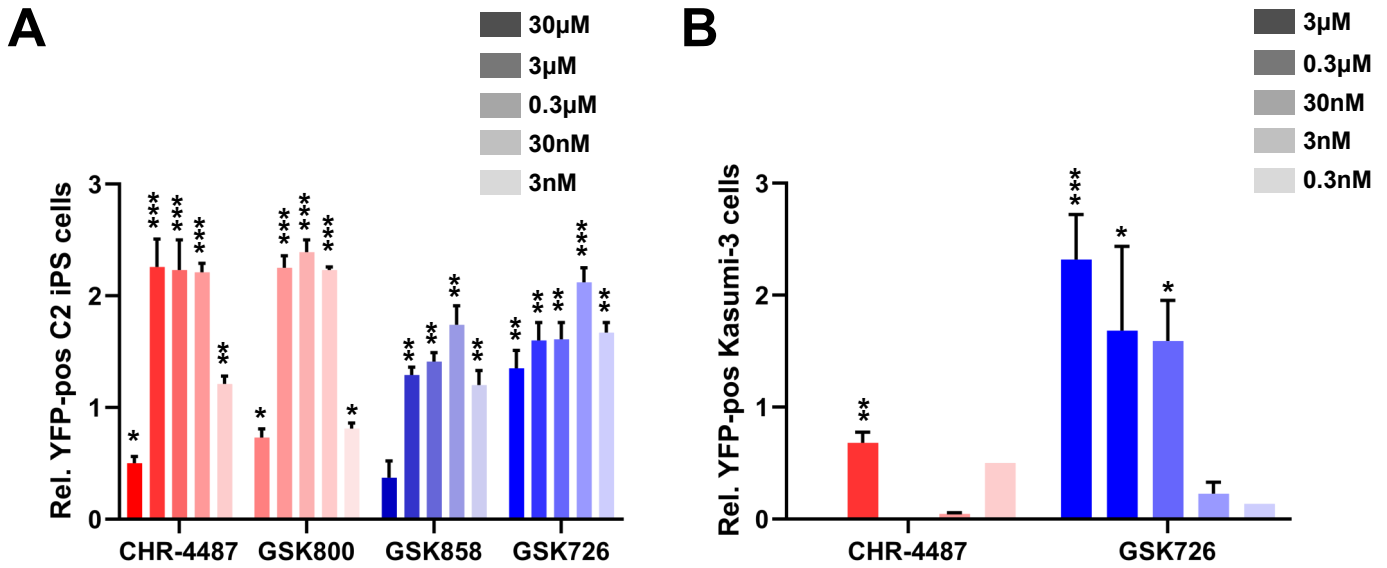

**Figure S5. I-BETs induce IE gene expression from HCMV latently infected CD34+ cell models.** (A) Human C2 induced pluripotent stem (iPS) cells and (B) Kasumi-3 CD34+ cells were both infected with HCMV TB40e IE86-eYFP for 3 days before treatment with HDACi (red bars) or I-BET (blue bars) across a range of concentrations (30 $\mu$ M to 0.3nM) for 48h. The number of YFP-positive cells was then counted per well in comparison to DMSO (negative control) and relative to PMA (100nM, positive control; set to 1).  $n = 3$ ; bars = mean +SEM. \* $P < 0.05$ , \*\* $P < 0.01$ , \*\*\* $P < 0.001$ .

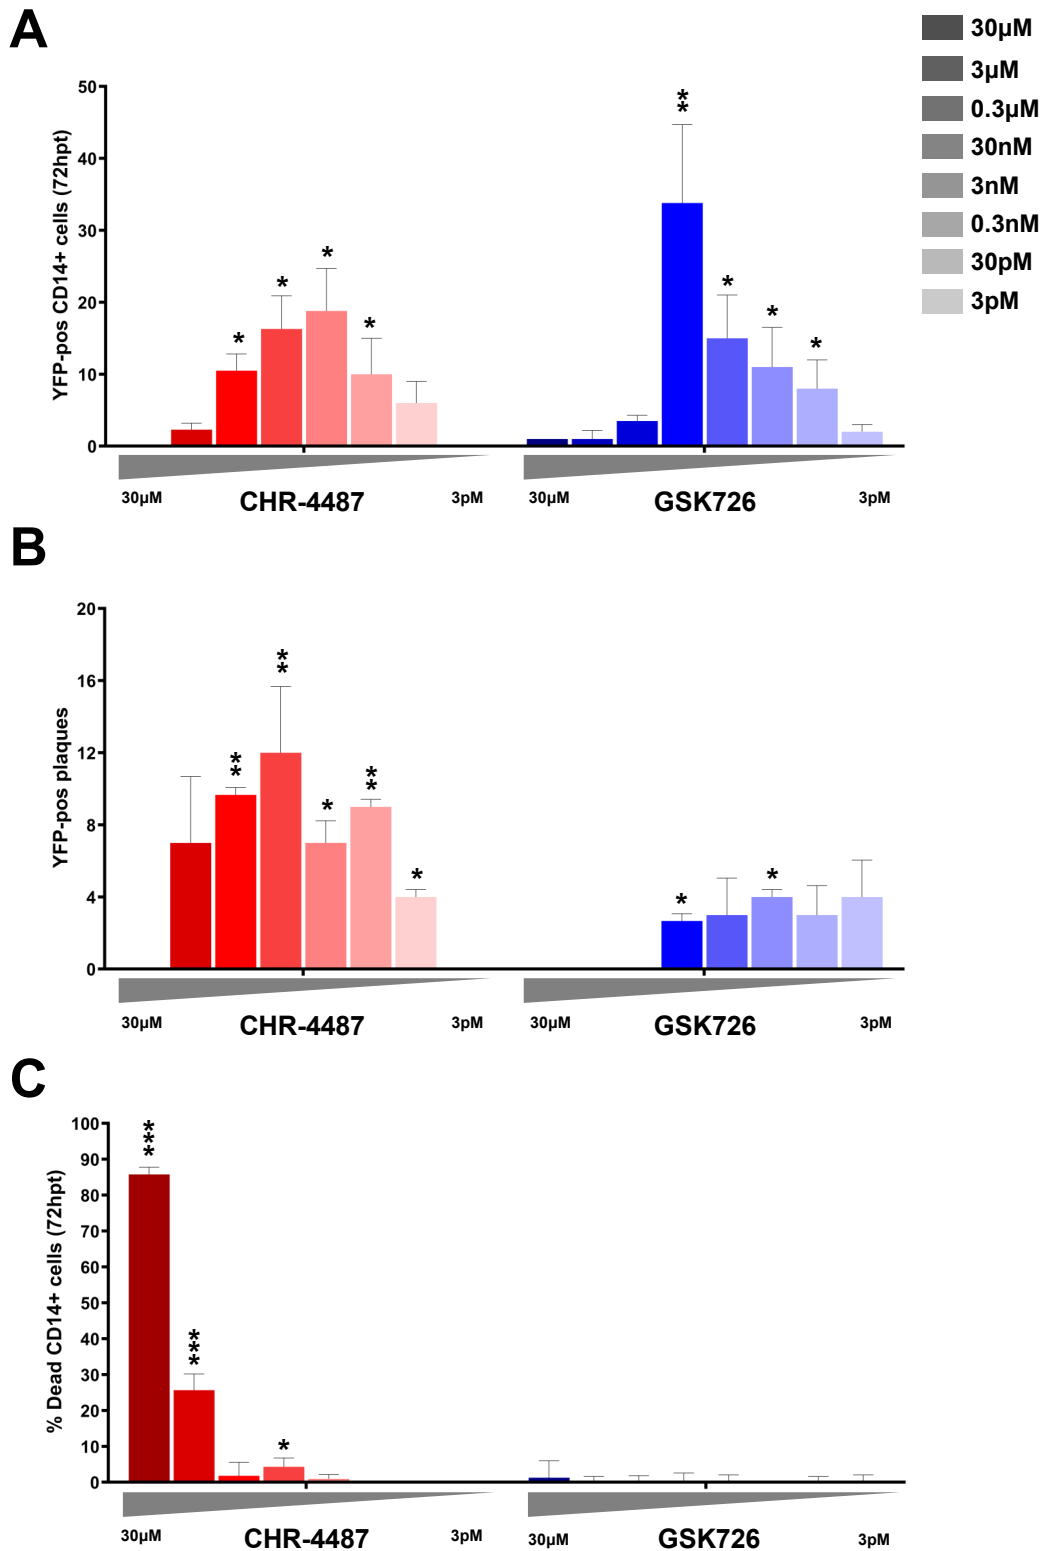

**Figure S6. Further I-BET dilutions induce viral IE gene expression from HCMV latently infected CD14+ monocytes.** (A) CD14+ monocytes isolated from apheresis cones were infected with HCMV TB40e IE86-eYFP for 5 days before treatment with HDACi (CHR-4487, red bars) or I-BET (GSK726, blue bars) across a range of concentrations (30μM to 3pM) for 72h. The number of YFP-positive cells per well was then counted, before (B) monocytes were overlaid with human foetal foreskin fibroblasts (HFFFs) and resulting plaques counted after 7 days. (C) CD14+ monocytes isolated from apheresis cones were treated with inhibitors for 72h before being stained with SYTOX (dead cells), Hoechst (nucleus) and counted.  $n = 3$ ; bars = mean +SEM. \* $P < 0.05$ , \*\* $P < 0.01$ , \*\*\* $P < 0.001$ .

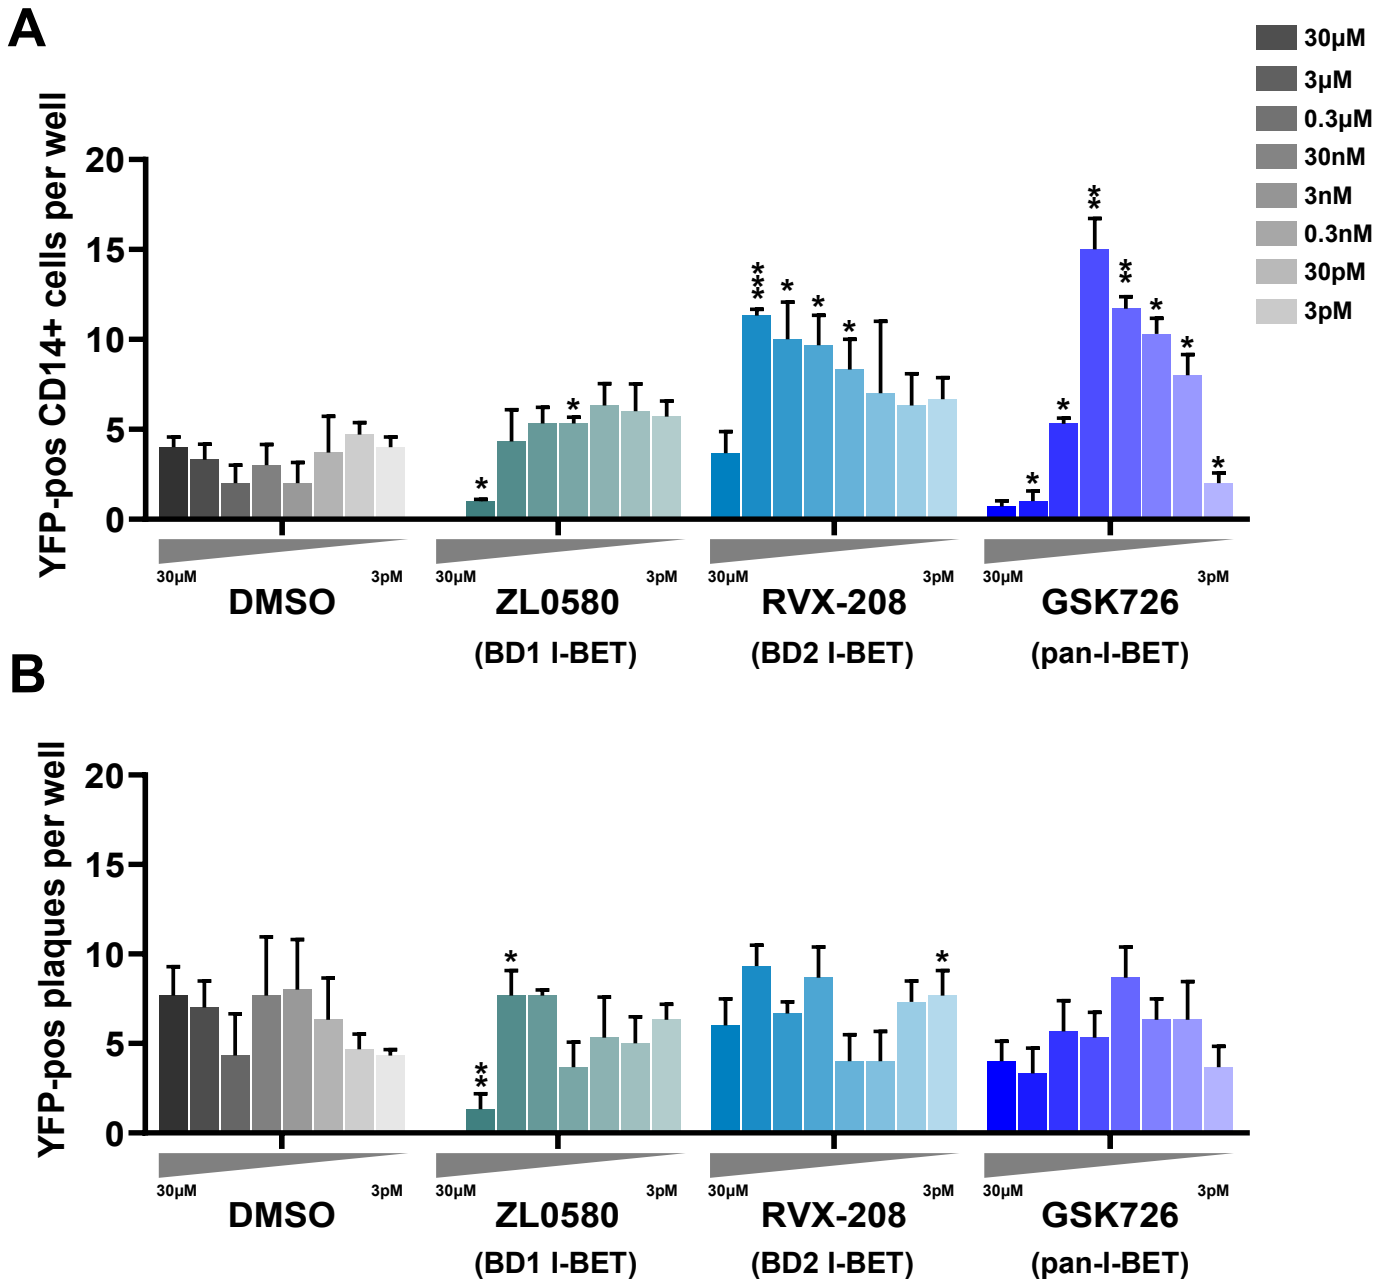

**Figure S7. Bromodomain-2 (BD2)-selective I-BET, RVX-208, more closely phenocopies pan-I-BET, GSK726.** (A) CD14<sup>+</sup> monocytes isolated from apheresis cones were infected with HCMV TB40e IE86-eYFP for 5 days before treatment with DMSO, BD1-selective I-BET (ZL0580), BD2-selective I-BET (RVX-208) or pan-I-BET (GSK726) across a range of concentrations (30µM to 3pM) for 96h. The number of YFP-positive cells per well was then counted, before (B) monocytes were overlaid with human foetal foreskin fibroblasts (HFFFs) and resulting plaques counted after 7 days. ( $n = 3$ ; bars = mean +SEM.) \* $P < 0.05$ , \*\* $P < 0.01$ , \*\*\* $P < 0.001$ .

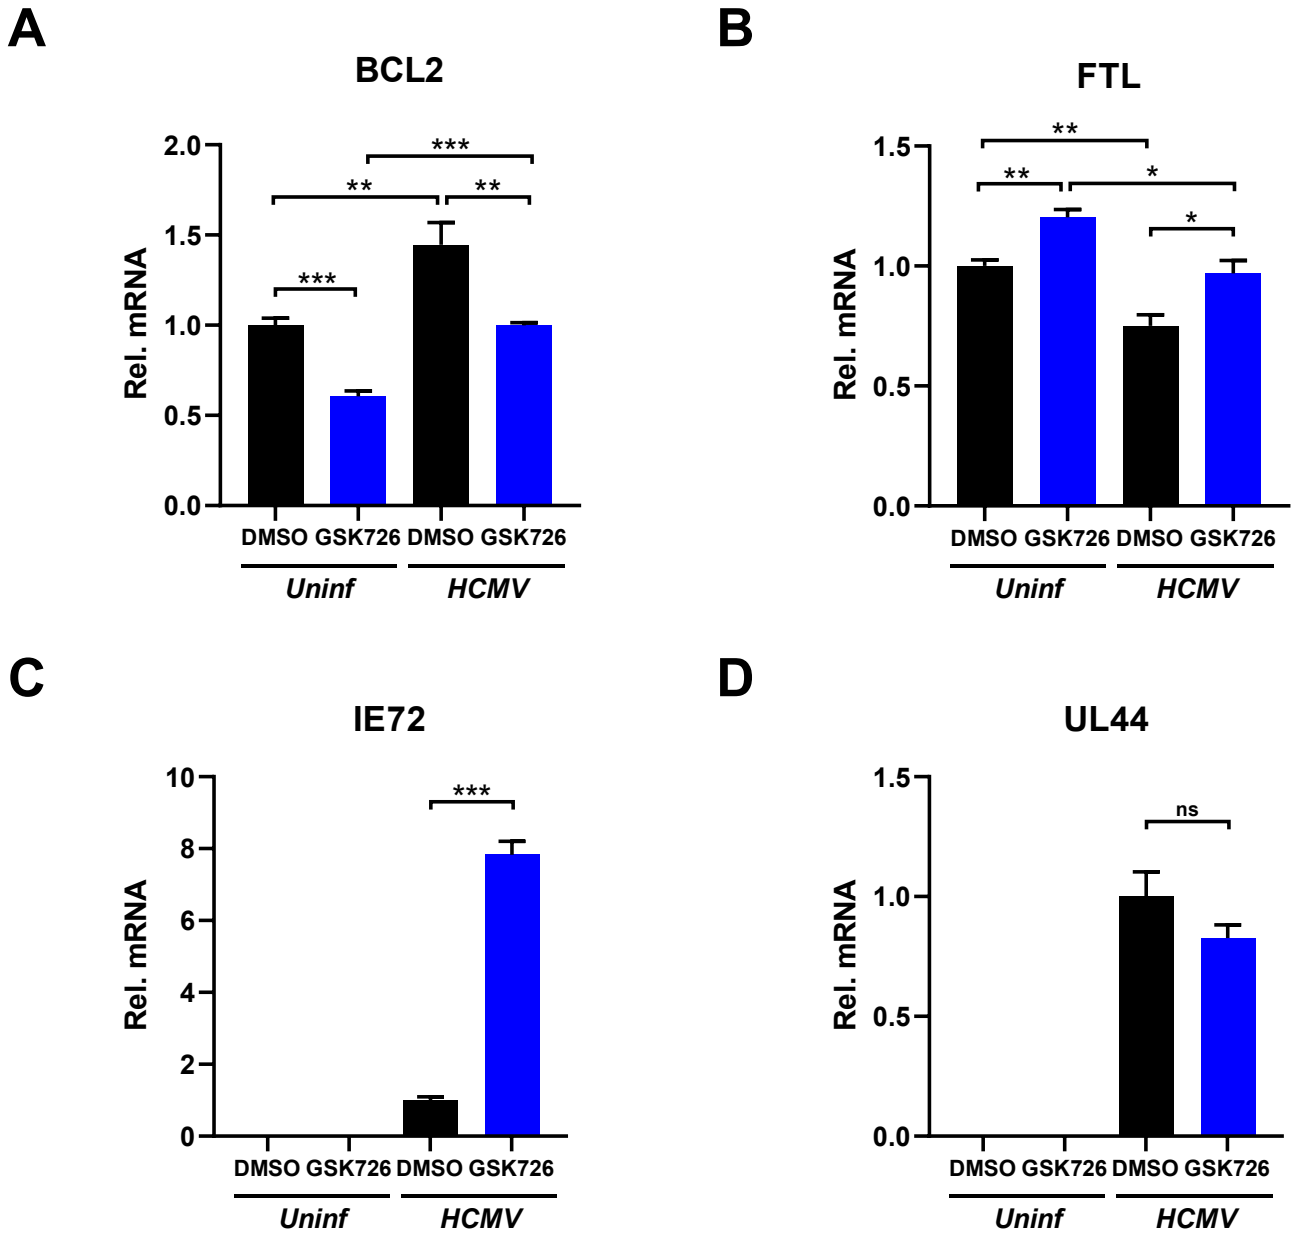

**Figure S8. Modulation of CD14<sup>+</sup> monocyte transcription with I-BET treatment.** CD14<sup>+</sup> monocytes isolated from apheresis cones remained uninfected (Uninf) or were infected (HCMV) with HCMV TB40e WT for 5 days before treatment with DMSO (black bars) or I-BET (GSK726 30nM, blue bars). RNA was isolated from cells after 24h and RT-qPCR then performed for BRD2/3/4 controlled cellular targets (A) BCL2 and (B) FTL or virus targets (C) IE72 and (D) UL44, all relative to host GAPDH ( $n = 3$ ; data = mean +SEM). \* $P < 0.05$ , \*\* $P < 0.01$ , \*\*\* $P < 0.001$ , ns = not significant.



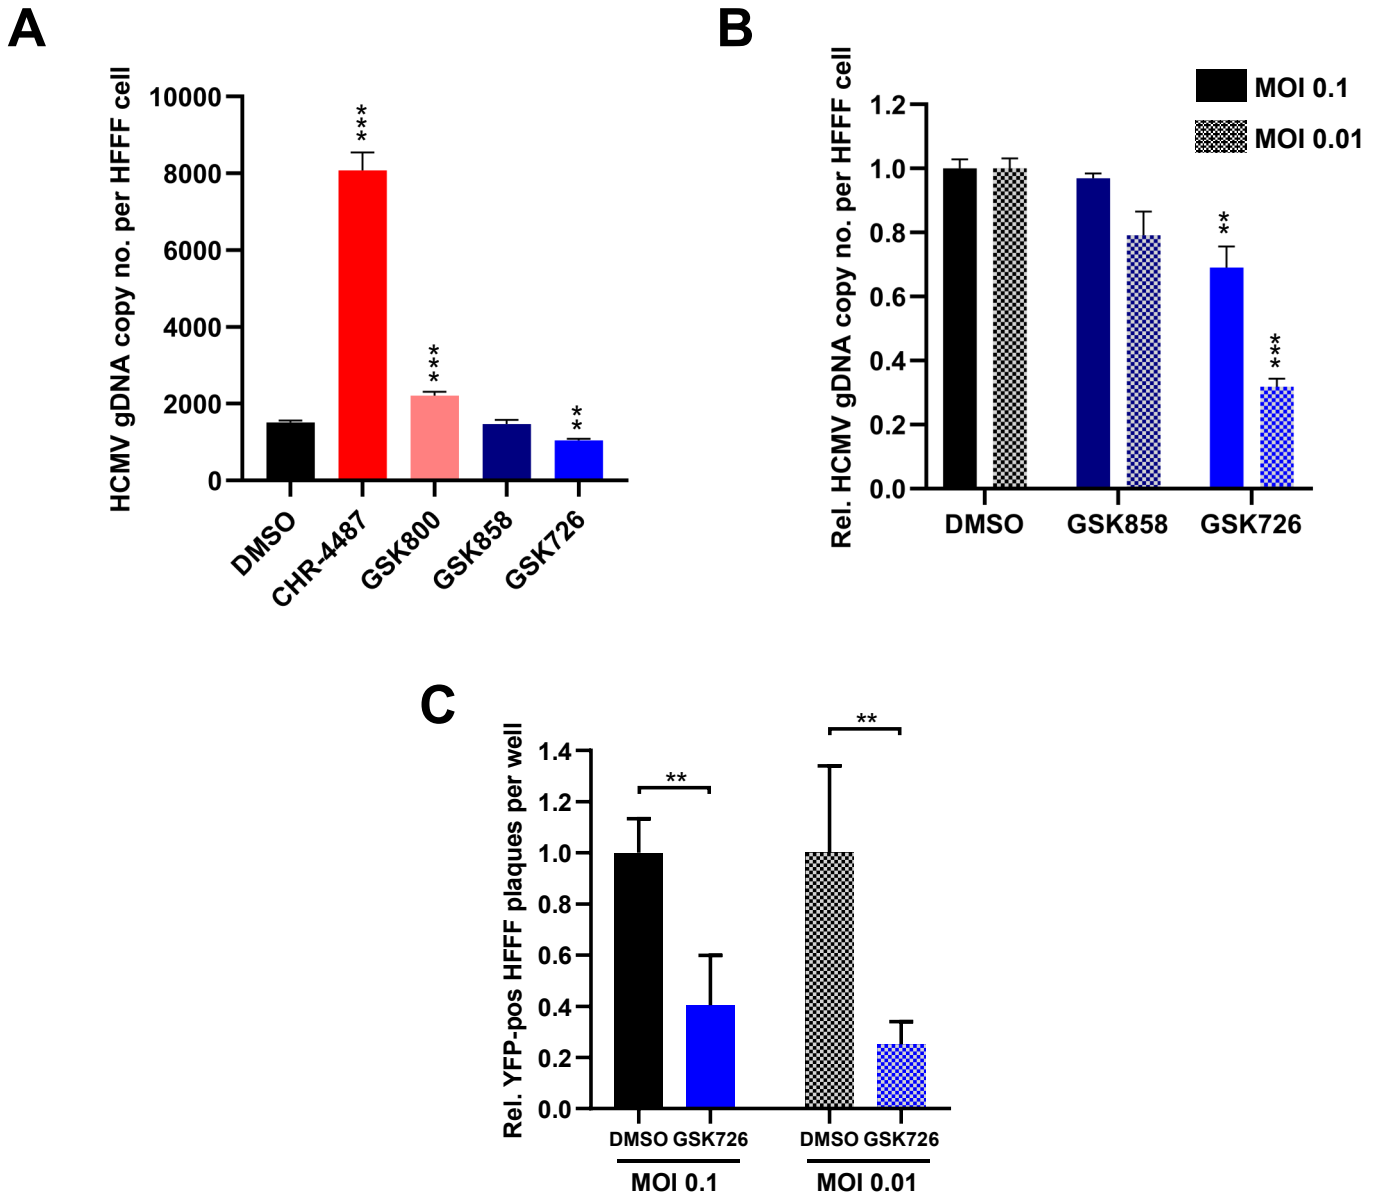

**Figure S9. I-BETs restrict HCMV lytic DNA replication.** (A) Human foetal foreskin fibroblasts (HFFFs) were treated with DMSO (control), HDACis (CHR-4487 and GSK800 at 30nM, red bars) and I-BETs (GSK858 and GSK726 at 30nM, blue bars) for 16 hours before infection with HCMV TB40e IE86-eYFP (MOI 0.1). After 72h, DNA was isolated and HCMV genome copy number determined per cell by qPCR of UL44 promoter relative to host GAPDH promoter ( $n = 3$ ; bars = mean +SEM). (B) HCMV genome copy number data is shown relative to DMSO control (dark bars, data from Supplementary Fig. 7A) with the addition of further data from related experiments at MOI = 0.01 (hatched bars). (C) Tissue culture supernatants (96h post-infection) from comparable experiments to B were used to infect fresh HFFFs and subsequent YFP-pos plaques counted after 7 days relative DMSO controls. \*\* $P < 0.01$ , \*\*\* $P < 0.001$ .

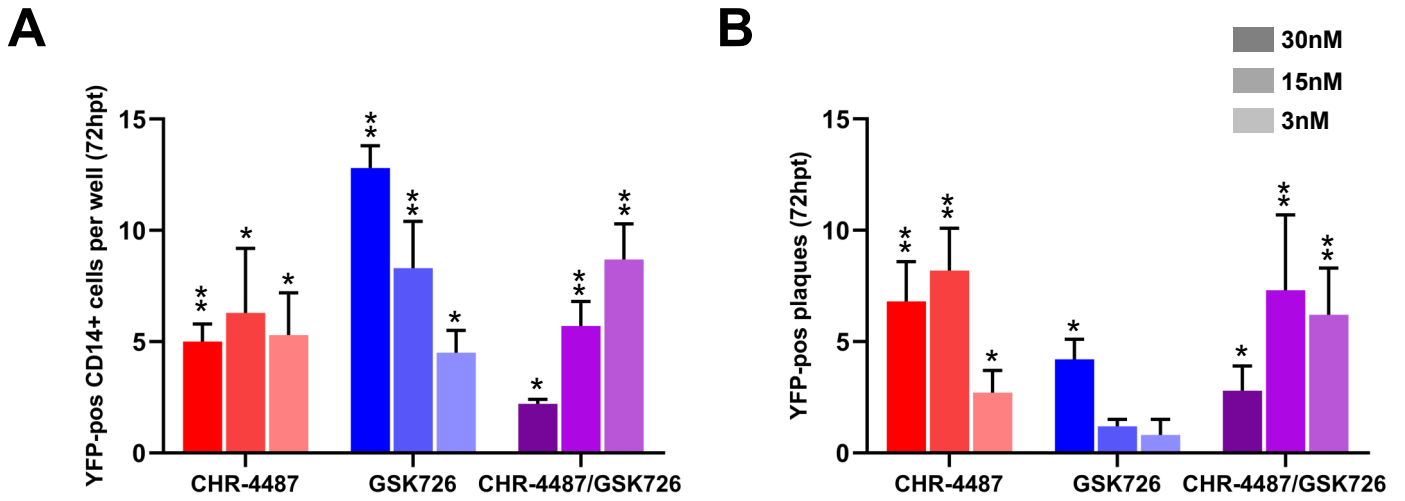

**Figure S10. HDACi & I-BET co-treatment is additive at lower concentrations but does not restrict HCMV productive replication.** (A) CD14<sup>+</sup> monocytes isolated from apheresis cones were infected with HCMV TB40e IE86-eYFP for 5 days before treatment with HDACi (CHR-4487, red bars), I-BET (GSK726, blue bars) or co-treated with both (purple bars) across a range of concentrations (30nM to 3nM) for 72h. The number of YFP-positive cells per well was then counted, before (B) monocytes were overlaid with human foetal foreskin fibroblasts (HFFFs) and resulting plaques counted after 7 days.  $n = 3$ ; bars = mean +SEM. \* $P < 0.05$ , \*\* $P < 0.01$ .



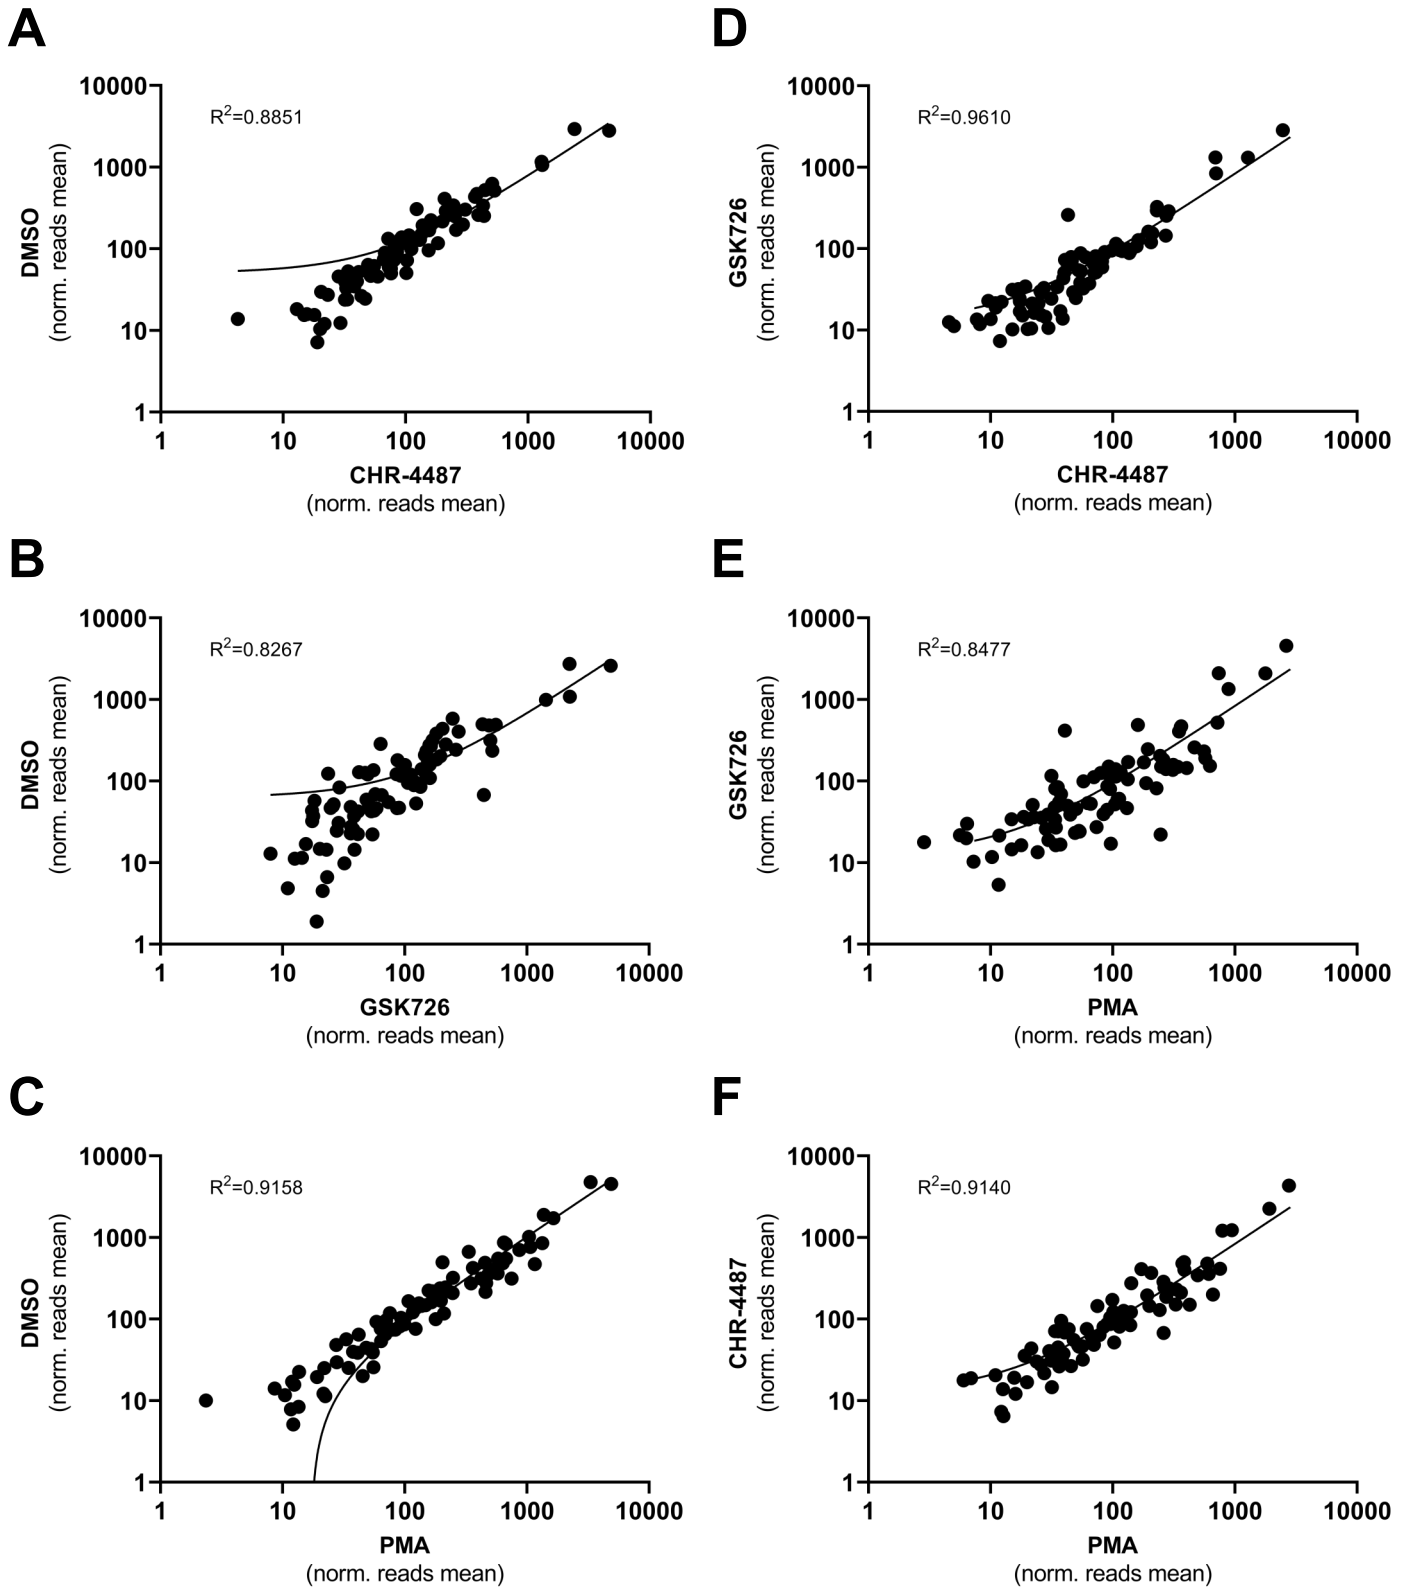

**Figure S12. Relationships between HCMV latent transcript profiles with compound treatment.** Correlations of HCMV transcript reads from RNA-seq data of HCMV experimentally infected latent CD14<sup>+</sup> monocytes treated with DMSO, HDACi (CHR-4487), I-BET (GSK726) or PMA (mean data from biological duplicates in Fig. 3F).

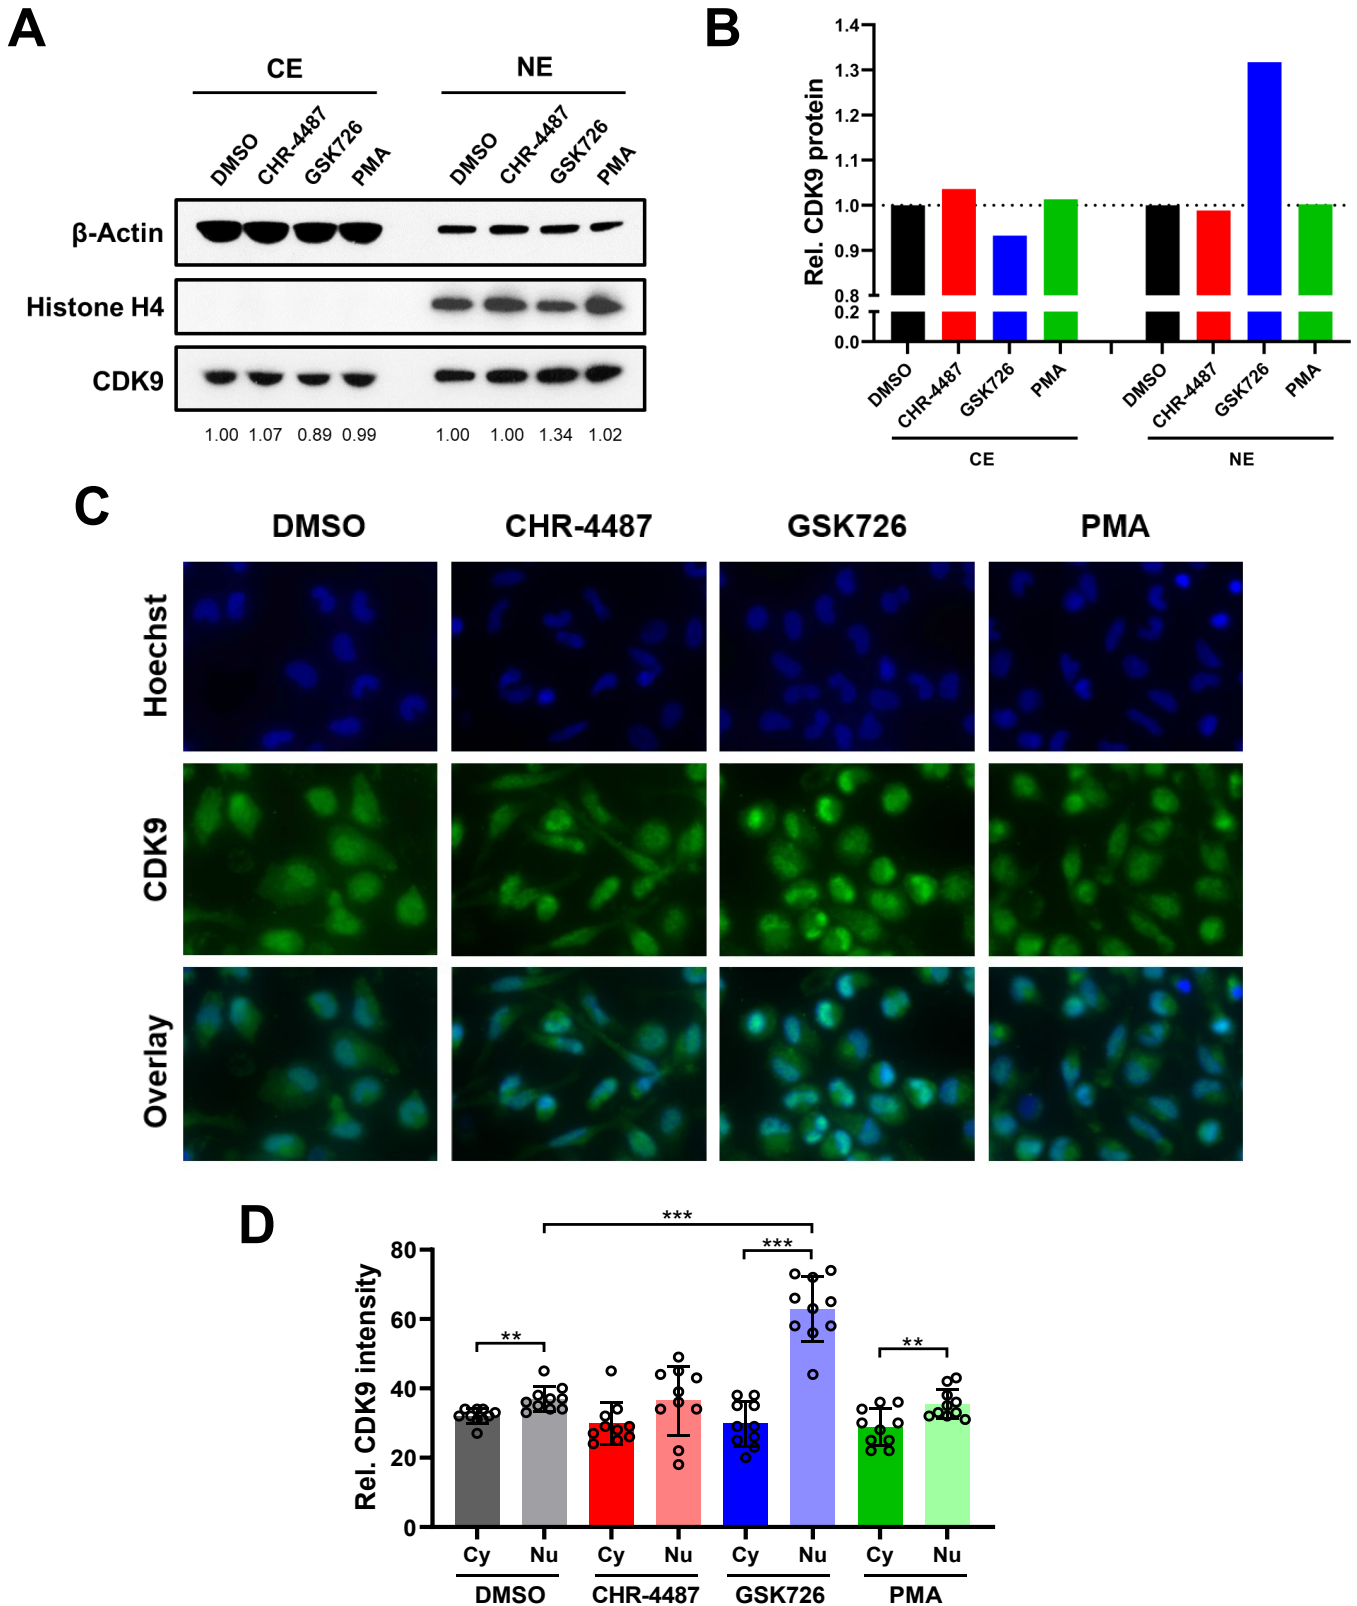

**Figure S13. I-BETs cause release of CDK9 from cytosolic repressive complexes to the nucleus.** CD14<sup>+</sup> monocytes isolated from apheresis cones were treated with DMSO (black bars), HDACi (CHR-4487 30nM, red bars), I-BET (GSK726 30nM, blue bars) or PMA (20nM, green bars) for 24h before cells were lysed with nuclear (NE) and cytoplasmic (CE) protein fractions isolated by centrifugation. (A) Samples were then separated by SDS-PAGE and immunoblotted using specific antibodies for  $\beta$ -actin, histone H4 and CDK9 (representative of  $n = 2$ ). (B) Resulting bands were then semi-quantified using ImageJ densitometry with CDK9 compared to the appropriate loading control (CE,  $\beta$ -actin; NE, histone H4) (mean of  $n = 2$ ). (C, D) CD14<sup>+</sup> monocytes treated as above for 24h were fixed and stained for CDK9 expression with Hoechst nuclear stain and the average intensity of cytoplasmic (Cy) and nuclear (Nu) expression quantified using Image J densitometry (\*\* $P < 0.01$ , \*\*\* $P < 0.001$ ).

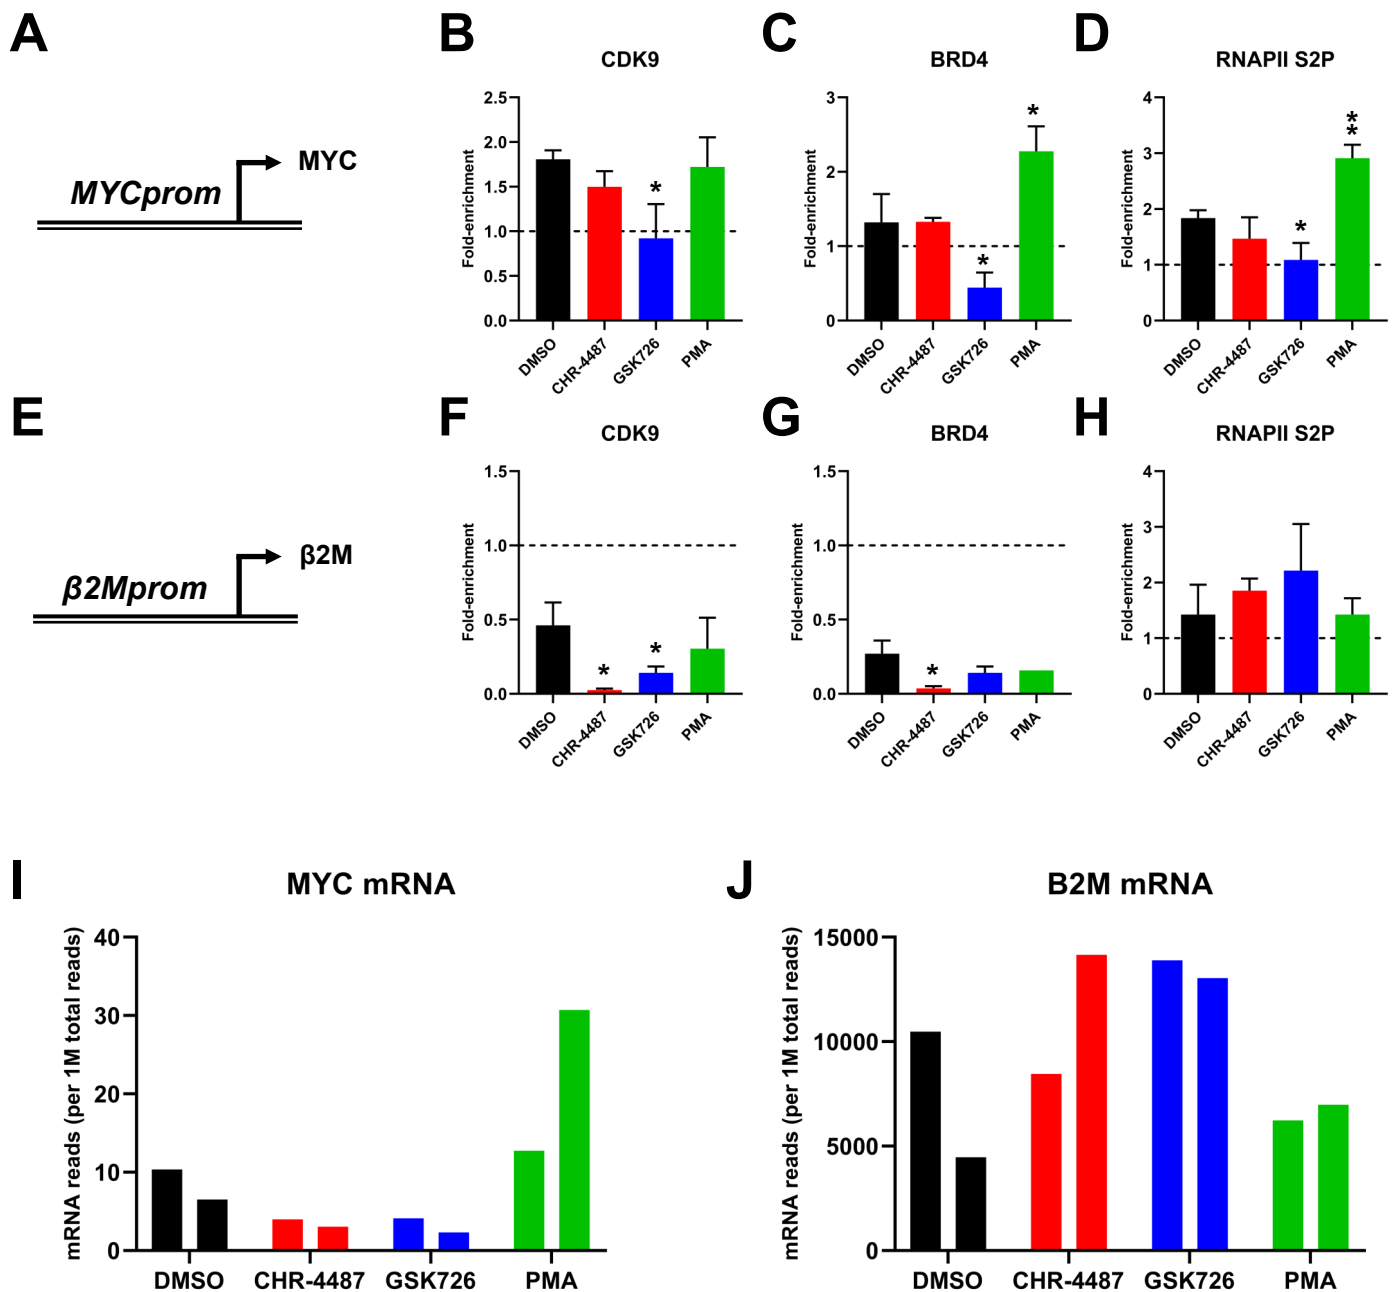

**Figure S14. Chromatin immunoprecipitation (ChIP) host gene control data.** Monocytic THP -1 cells were infected with HCMV TB40e IE86-eYFP for 3 days before treatment with DMSO (black bars), HDACi (CHR-4487 30nM, red bars), I-BET (GSK726 30nM, blue bars) or PMA (100nM, green bars). After 48h, cells were fixed and samples isolated for chromatin immunoprecipitation (ChIP) analysis. qPCR was then employed to determine the enrichment of (A-D) MYC- and (E-H) beta2M-promoter DNA using antibodies specific for (B, F) CDK9, (C, G) BRD4, (D, H) RNAPII S2P relative to isotype controls (dotted line, set to 1) ( $n = 3$ ; bars = mean + SEM). (I, J) RNA-seq data from isolated YFP-positive CD14+ monocytes infected with HCMV TB40e IE86-eYFP for 5 days before treatment with DMSO (black bars), HDACi (CHR-4487 30nM, red bars) or I-BET (GSK726 30nM, blue bars) or PMA (20nM, green bars). Data from biological duplicates. \* $P < 0.05$ , \*\* $P < 0.01$ .

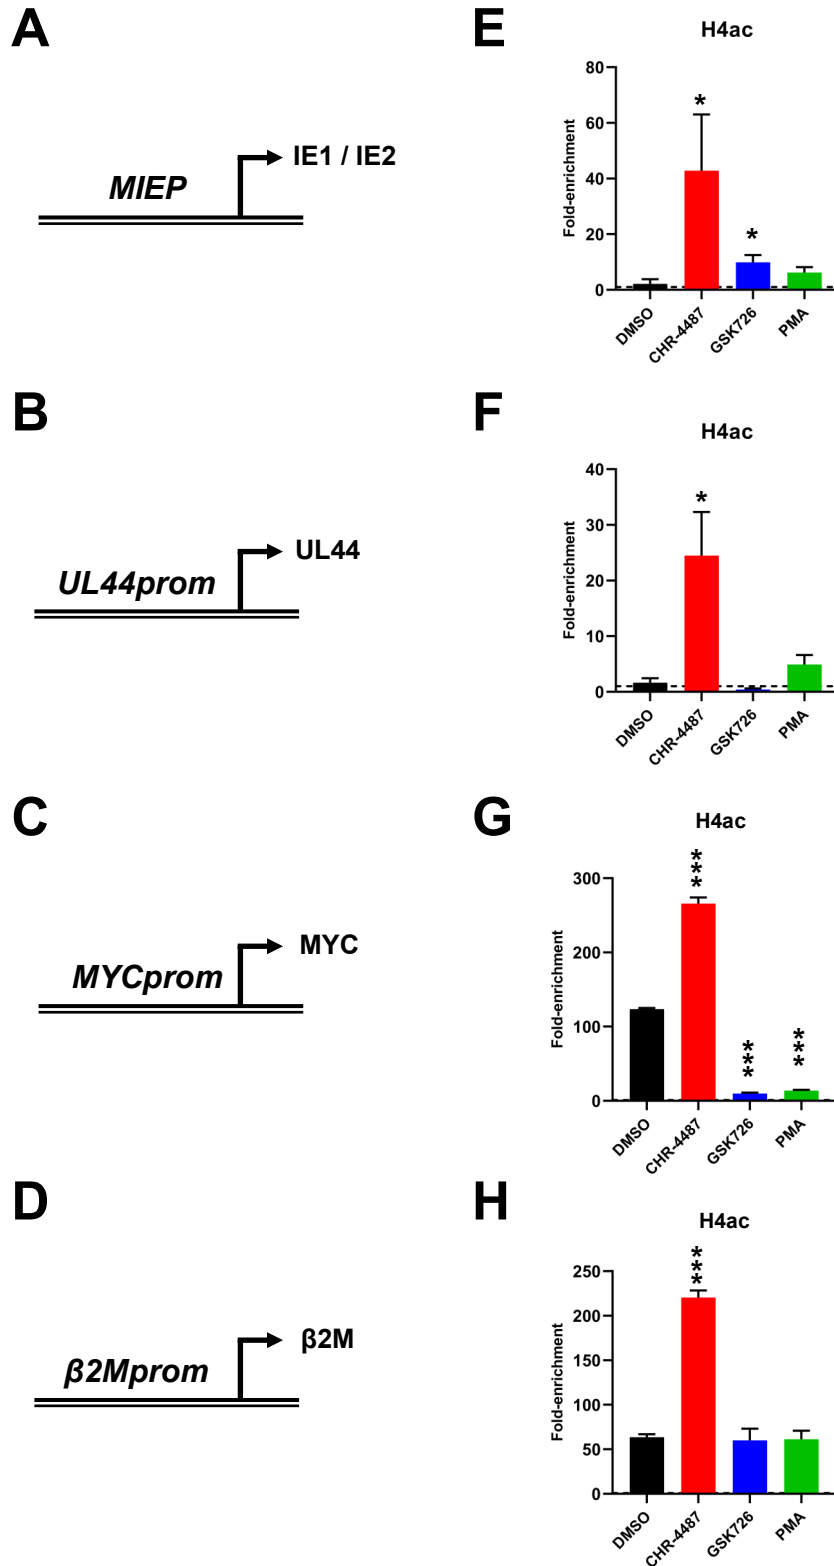

**Figure S15. Histone acetylation is associated with promoter transcriptional activity and hyperacetylation with HDACi treatment.** Monocytic THP-1 cells were infected with HCMV TB40e IE86-eYFP for 3 days before treatment with DMSO (black bars), HDACi (CHR-4487 30nM, red bars), I-BET (GSK726 30nM, blue bars) or PMA (100nM, green bars). After 48h, cells were fixed and samples isolated for chromatin immunoprecipitation (ChIP) analysis. qPCR was then employed to determine the enrichment of (A, B) MIEP, (C, D) UL44-, (E, F) MYC- and (G, H)  $\beta$ 2M-promoter DNA using antibodies specific for (B, D, F, H) acetylated histone H4 (H4ac) relative to isotype control (dotted line, set to 1) ( $n = 3$ ; bars = mean +SEM). \* $P < 0.05$ , \*\*\* $P < 0.001$ .

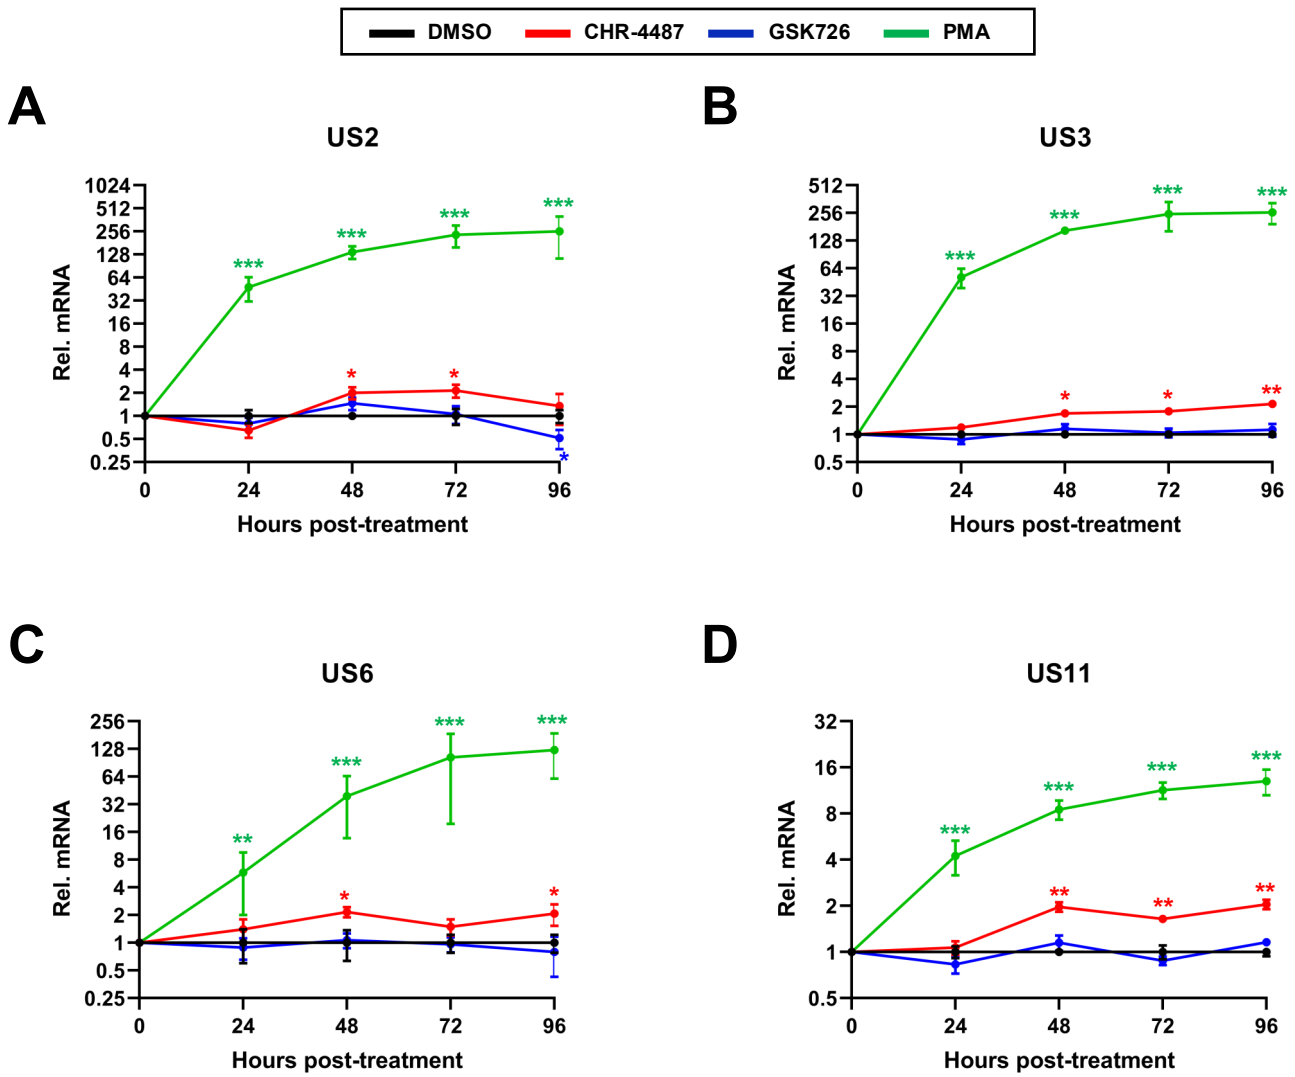

**Figure S16. I-BET treatment does not lead to transcriptional increase of HCMV immune evasion genes US2, US3, US6 or US11.** CD14<sup>+</sup> monocytes isolated from apheresis cones were infected with HCMV TB40e WT for 5 days before treatment with DMSO (black lines), HDACi (CHR-4487 30nM, red lines), I-BET (GSK726 30nM, blue lines) and PMA (20nM, green lines). RNA was isolated from cells every 24h for 4 days and RT-qPCR was then performed for virus immune evasion genes (A) US2, (B) US3, (C) US6 and (D) US11 relative to host GAPDH ( $n = 3$ ; data = mean  $\pm$  SEM). \* $P < 0.05$ , \*\* $P < 0.01$ , \*\*\* $P < 0.001$ .



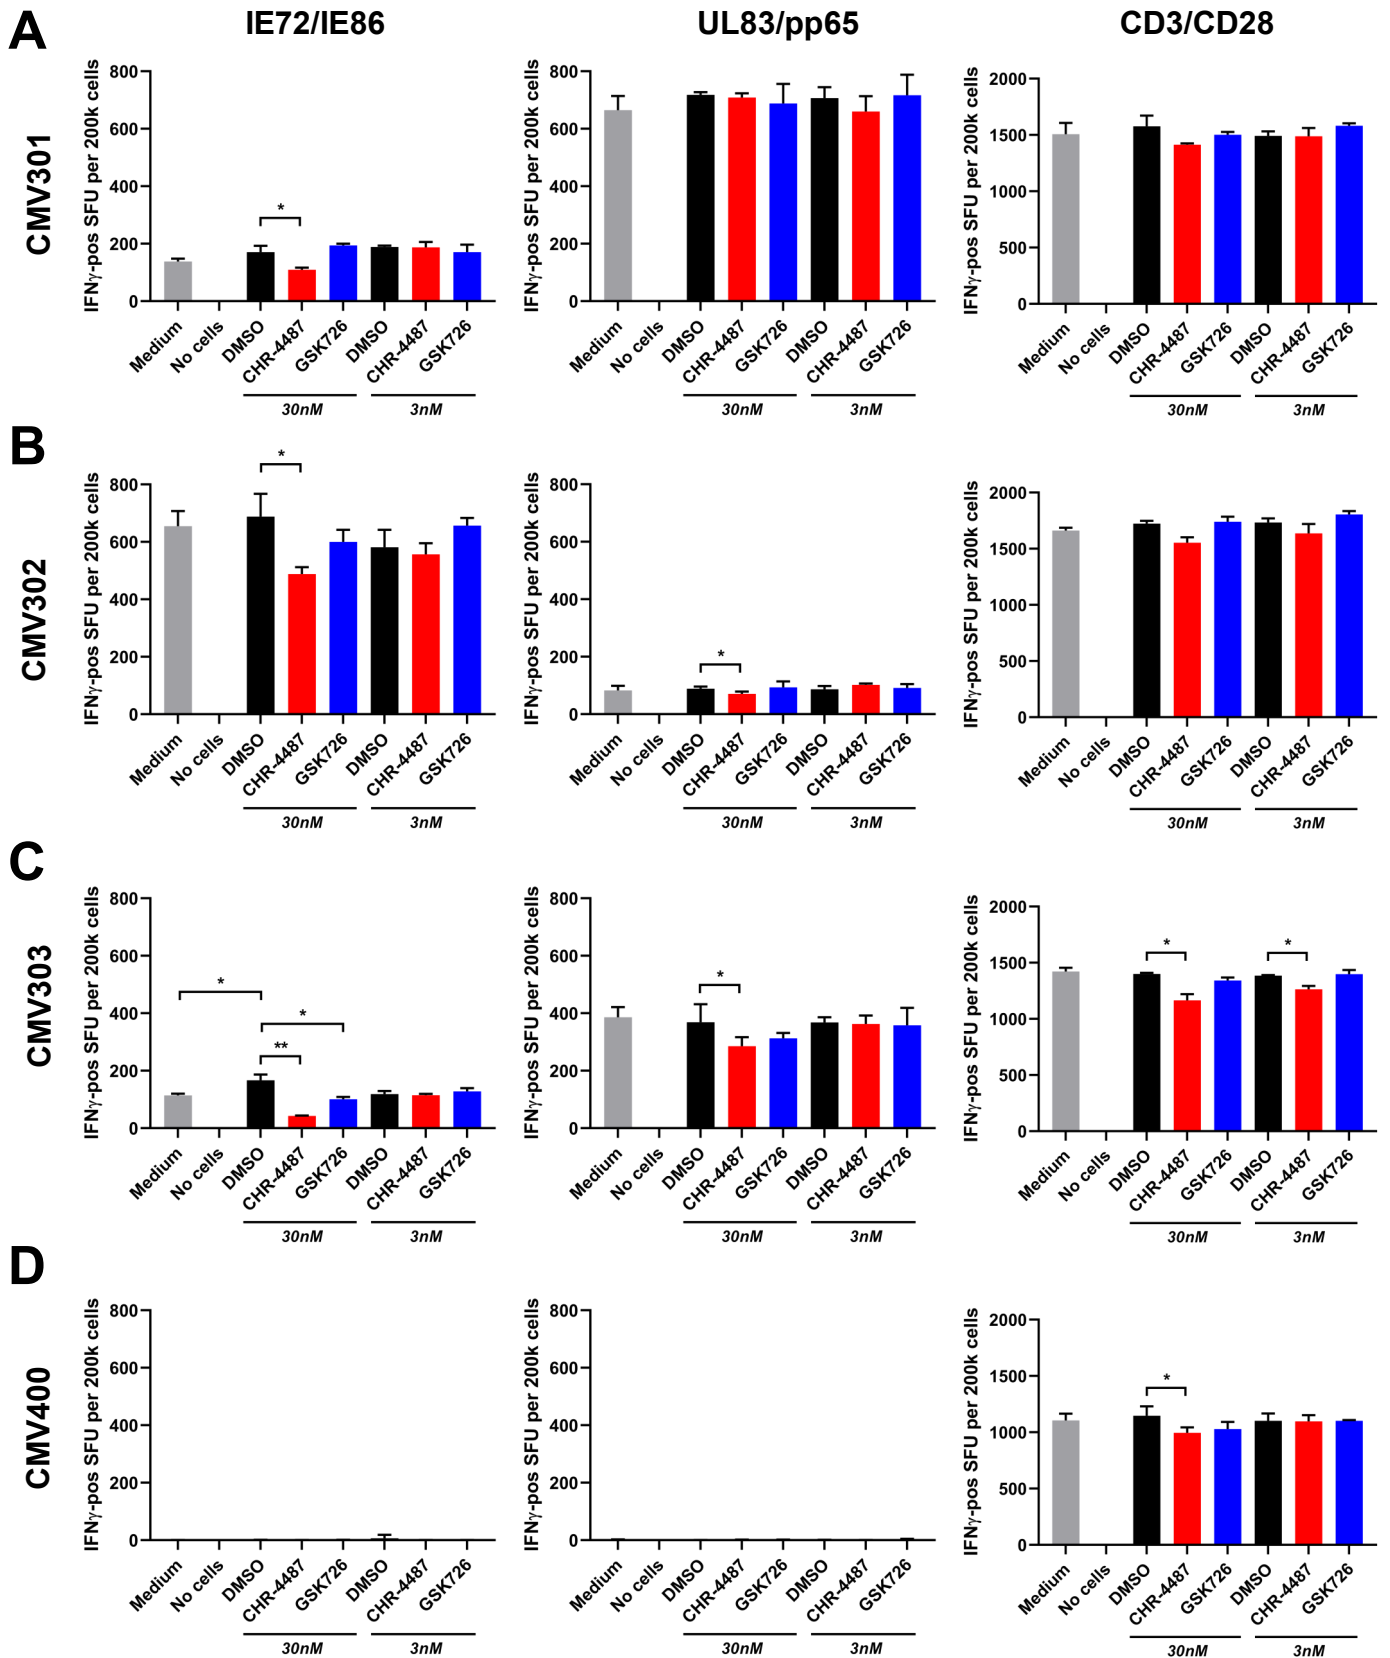

**Figure S17. I-BETs do not inhibit T cell responses to HCMV-specific antigen stimulation.** Peripheral blood was harvested from three seropositive donors (A-C) and one seronegative (D) donor before isolation of peripheral blood mononuclear cells (PBMC) by centrifugation. Fluorospot plates were then seeded with 200k PBMC and treated with DMSO (black bars), HDACi (CHR-4487, red bars) or I-BET (GSK726, blue bars) (30nM and 3nM) with concurrent treatment of HCMV-specific peptides for IE72/IE86 (left column), UL83/pp65 (middle column) or T cell activator CD3/CD28 (right column). After 48h, plates were processed and IFN $\gamma$ -specific spot forming units (SFU) counted. *P*-values (Student's t-test): \**P*<0.05, \*\**P*<0.01. (*n* = 3; data = mean +SEM).

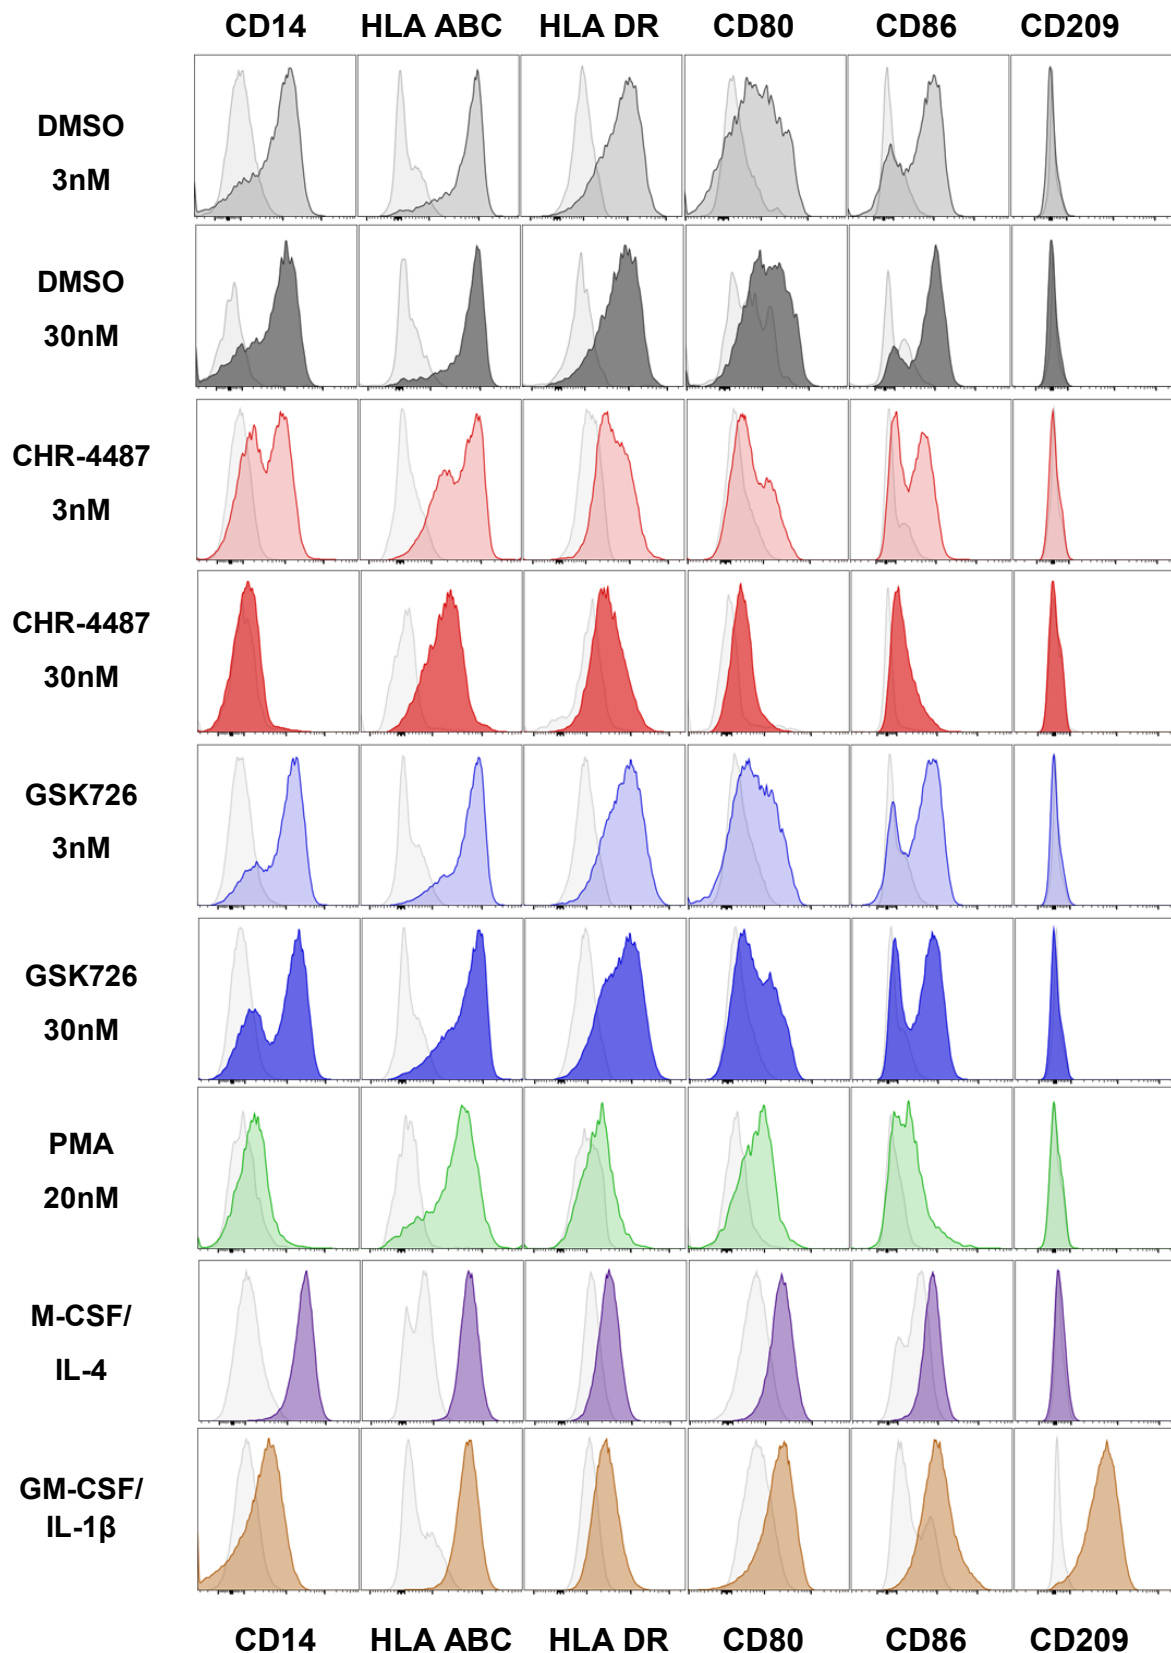

**Figure S18. I-BETs do not differentiate CD14<sup>+</sup> monocytes at concentrations that induce IE gene expression from latently infected CD14<sup>+</sup> monocytes.** CD14<sup>+</sup> monocytes were isolated from apheresis cones and treated for 96h with compounds: DMSO (negative control, equivalent concentration); HDACi (CHR-4487, red peaks, 3nM/30nM); I-BET (GSK726, blue peaks, 3nM/30nM); PMA (positive control, green peaks, 20nM); M-CSF/IL-4 (macrophage differentiation, purple peaks); and GM-CSF/IL-1 $\beta$  (dendritic cell differentiation, orange peaks). Cells were then stained for differentiation markers: CD14 (monocyte); HLA ABC (MHC class I); HLA DR (MHC class II); CD80 (monocyte/macrophage); CD86 (monocyte/macrophage); CD209 (dendritic cell). Surface expression was then assessed by flow cytometry compared to isotype controls (light grey peaks throughout).

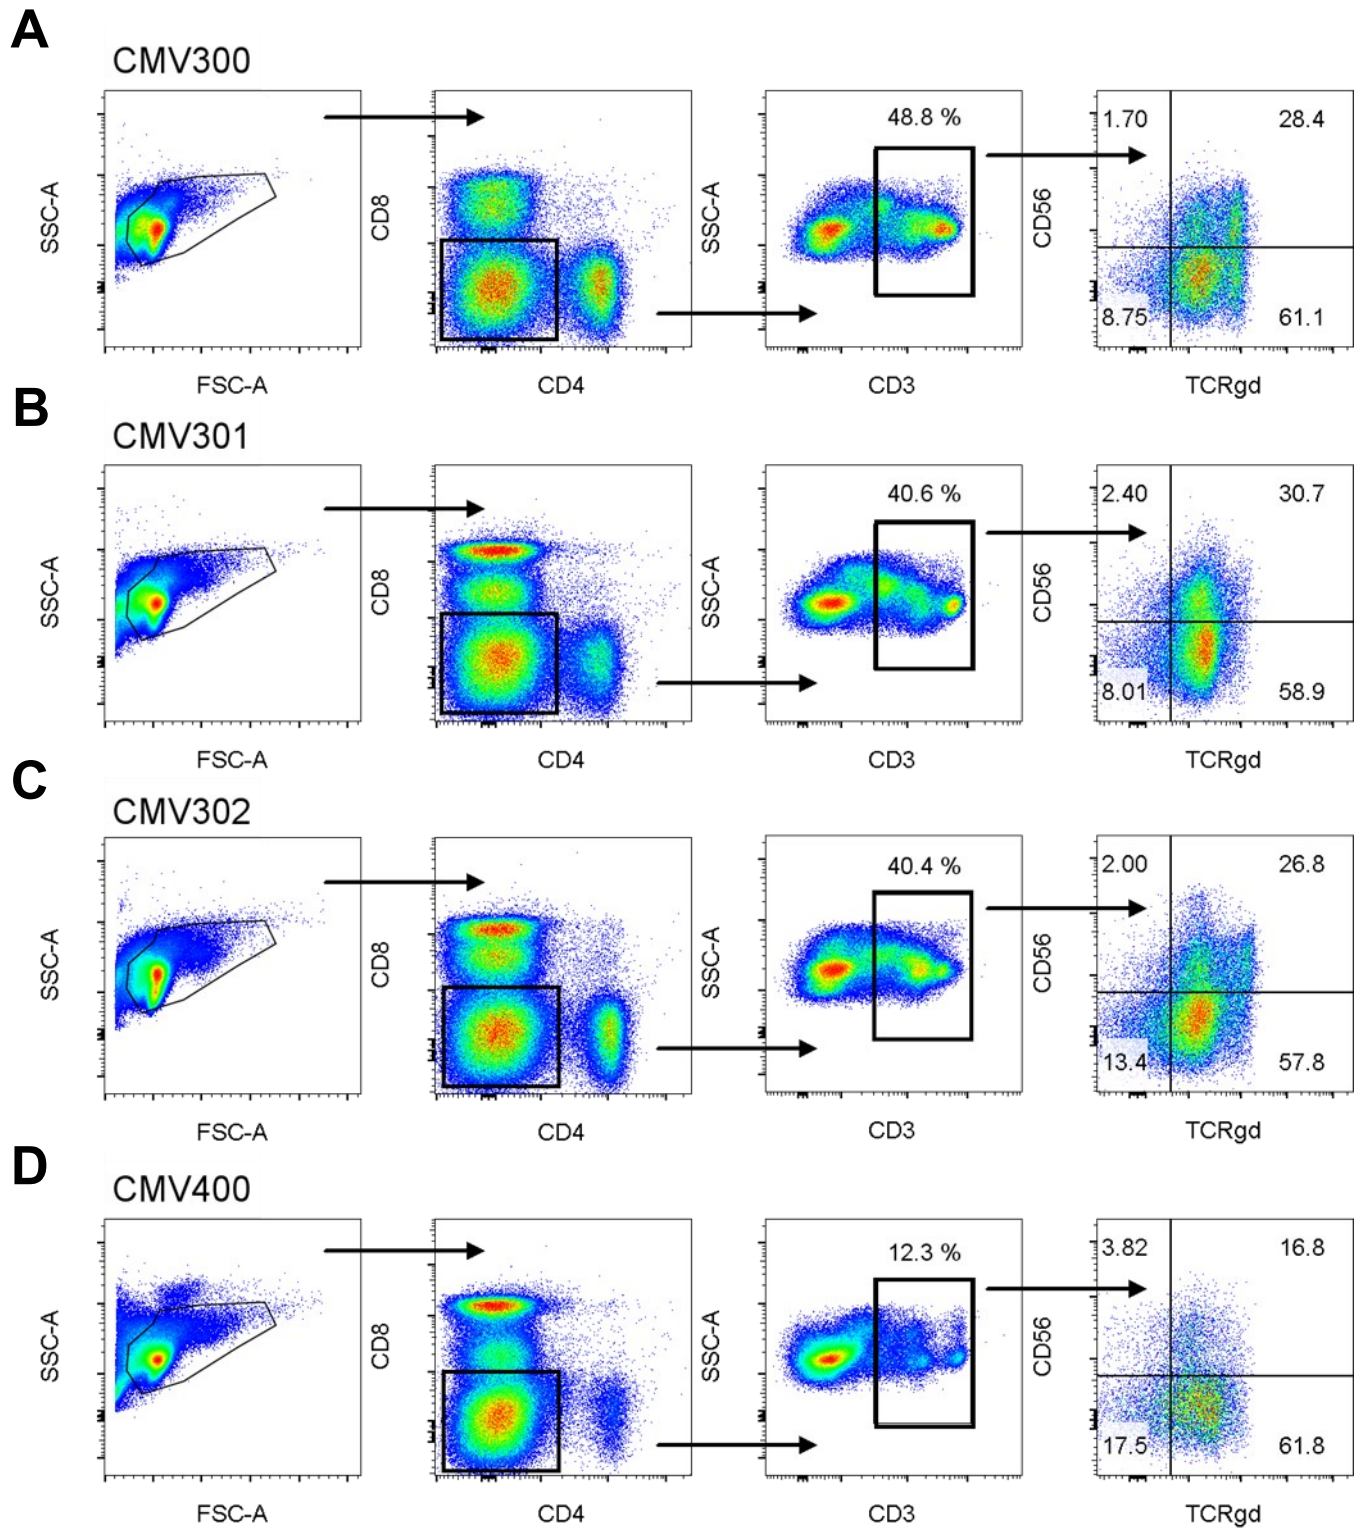

**Figure S19. CD3<sup>+</sup>/CD4<sup>-</sup>/CD8<sup>-</sup> cytotoxic cells have  $\gamma/\delta$  T cells markers.** Total peripheral blood mononuclear cells (PBMC) were isolated from three seropositive donors (A-C) and one seronegative donor (D) and stained for lymphocyte surface markers CD3, CD4, CD8 and T cell receptor (TCR) subtypes  $\alpha/\beta$  and  $\gamma/\delta$ . Cell populations were then phenotyped by flow cytometry.

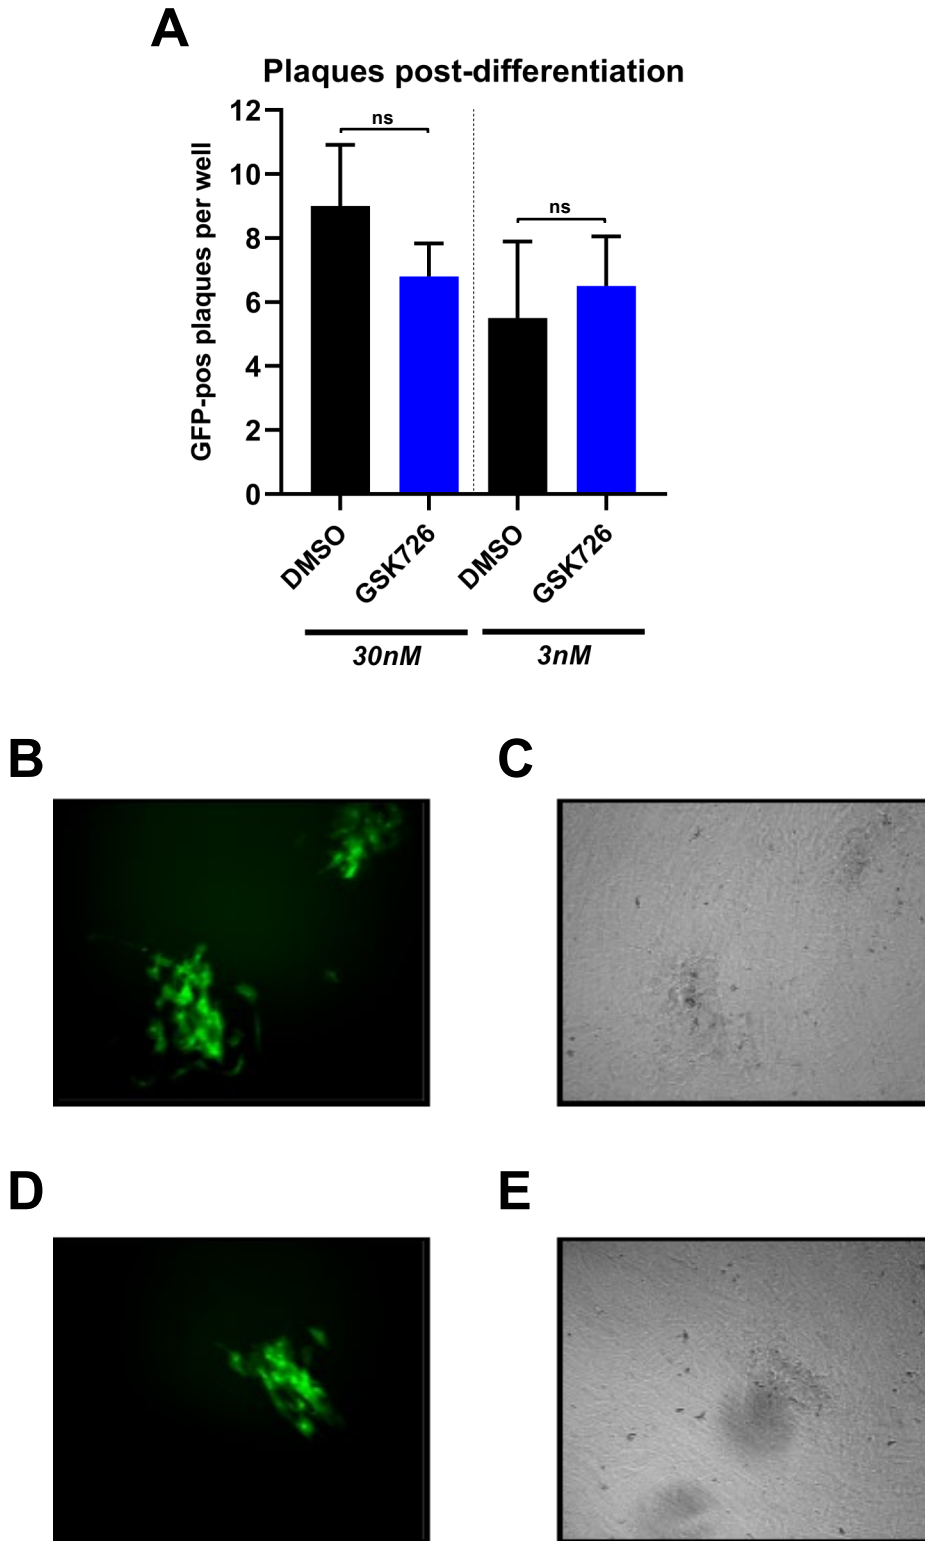

**Figure S20. I-BET treatment does not inhibit HCMV DNA replication or productive infection after compound withdrawal and CD14<sup>+</sup> monocyte differentiation.** CD14<sup>+</sup> monocytes isolated from apheresis cones were infected with HCMV TB40e UL32-GFP for 5 days before treatment with either DMSO (black bars) or I-BET (GSK726, blue bars) (30nM and 3nM) for 4 days. Treatments were then withdrawn and wells overlaid with human foetal foreskin fibroblasts (HFFFs) concurrent with CD14<sup>+</sup> monocyte differentiation (M-CSF/IL-4) for 4 days. (A) Plaques were then counted (data = quadruplicate mean +SEM) with representative images shown for DMSO (B, GFP; C, brightfield) and GSK726 (D, GFP; E, brightfield) treatments. ns, not significant.

## Supplementary Tables

**Table S1.** Epigenetic inhibitors and controls.

| Compound | Full name           | Target                    | Target activity | Source               | Cat. no.  |
|----------|---------------------|---------------------------|-----------------|----------------------|-----------|
| DMSO     | Dimethyl sulphoxide | Control solvent           | N/A             | Sigma-Aldrich        | D2650     |
| GSK959   |                     | BRPF1                     | HAT             | GlaxoSmithKline      |           |
| GSK6853  |                     | BRPF1                     | HAT             | GlaxoSmithKline      |           |
| GSK9311  |                     | GSK6853 Neg Ctrl          | (HAT)           | GlaxoSmithKline      |           |
| GSK077   |                     | CBP/P300                  | HAT             | GlaxoSmithKline      |           |
| GSK4027  |                     | PCAF/GCN5                 | HAT             | GlaxoSmithKline      |           |
| GSK4028  |                     | GSK4027 Neg Ctrl          | (HAT)           | GlaxoSmithKline      |           |
| VPA      | Valproic acid       | HDAC Class I              | HDAC            | Cambridge Bioscience | 13033     |
| MC1568   |                     | HDAC Class IIa            | HDAC            | Cambridge Bioscience | 16265     |
| TSA      | TrichostatinA       | HDAC Class I, II & IV     | HDAC            | Sigma-Aldrich        | T1952     |
| SAHA     | Vorinostat          | HDAC Class I, II & IV     | HDAC            | Cambridge Bioscience | 10009929  |
| PBST     | Panobinostat        | HDAC Class I, II & IV     | HDAC            | Cambridge Bioscience | 13280     |
| ROM      | Romidepsin          | HDAC Class I              | HDAC            | Sigma-Aldrich        | SML1175   |
| TPM      | Topirimate          | HDAC                      | HDAC            | Sigma-Aldrich        | T0575     |
| TQM      | Tasquinimod         | HDAC4                     | HDAC            | Cambridge Bioscience | 17692     |
| CHR-4487 |                     | HDACi                     | HDAC            | GlaxoSmithKline      |           |
| GSK800   |                     | CHR-4487 Neg Ctrl         | (HDAC)          | GlaxoSmithKline      |           |
| TMP195   |                     | Class Iia HDAC            | HDAC            | GlaxoSmithKline      |           |
| TMP058   |                     | TMP195 Neg Ctrl           | (HDAC)          | GlaxoSmithKline      |           |
| DUAL946  |                     | HDACi/BETi                | HDAC/Bromo      | GlaxoSmithKline      |           |
| +JQ1     |                     | pan-BET (BRD2/3/4/t)      | Bromo           | Sigma-Aldrich        | SML1524   |
| -JQ1     |                     | +JQ1 Neg Ctrl             | (Bromo)         | Sigma-Aldrich        | SML1525   |
| iBRD9    |                     | BRD9                      | Bromo           | GlaxoSmithKline      |           |
| iBET151  |                     | pan-BET (BRD2/3/4/t)      | Bromo           | GlaxoSmithKline      |           |
| GSK858   |                     | pan-BET (BRD2/3/4/t)      | Bromo           | GlaxoSmithKline      |           |
| GSK726   |                     | pan-BET (BRD2/3/4/t)      | Bromo           | GlaxoSmithKline      |           |
| GSK8814  |                     | ATAD2/2B bromodomain      | Bromo           | GlaxoSmithKline      |           |
| GSK8815  |                     | GSK8814 Neg Ctrl          | (Bromo)         | GlaxoSmithKline      |           |
| GSK388   |                     | ATAD2 bromodomain         | Bromo           | GlaxoSmithKline      |           |
| GSK551   |                     | GSK388 Neg Ctrl           | (Bromo)         | GlaxoSmithKline      |           |
| GSK2801  |                     | BAZ2A/B                   | Bromo           | GlaxoSmithKline      |           |
| GSK573   |                     | BAZ2A/B, GSK2801 Neg Ctrl | (Bromo)         | GlaxoSmithKline      |           |
| LSD-1    |                     | LSD1                      | HDM             | GlaxoSmithKline      |           |
| GSK856   |                     | Jarid1a/b/c               | HDM             | GlaxoSmithKline      |           |
| GSK467   |                     | KDM5/JARID1               | HDM             | GlaxoSmithKline      |           |
| GSK-J4   |                     | KDM6A/B & KDM5s           | HDM             | GlaxoSmithKline      |           |
| GSK-J5   |                     | GSK-J4 Neg Ctrl           | (HDM)           | GlaxoSmithKline      |           |
| GSK591   |                     | PRMT5                     | HMT             | GlaxoSmithKline      |           |
| GSK0071  |                     | G9a/GLP                   | HMT             | GlaxoSmithKline      |           |
| GSK343   |                     | EZH2                      | HMT/PRC2        | GlaxoSmithKline      |           |
| GSK503   |                     | EZH2                      | HMT/PRC2        | GlaxoSmithKline      |           |
| PTC-029  |                     | Bmi-1i / PRC1i            | PRC1            | Sigma-Aldrich        | SML1143   |
| GSK864   |                     | mutant IDH1               | Other           | GlaxoSmithKline      |           |
| SKF-426  |                     | Checkpoint inhibitor      | Other           | GlaxoSmithKline      |           |
| GSK145   |                     | HIV reactivation          | Other           | GlaxoSmithKline      |           |
| FLAV     | Flavopiridol        | CDK9                      | CDK9i           | Sigma-Aldrich        | F3055     |
| dBET1    |                     | BRD4                      | BRD4 protac     | Cambridge Bioscience | CAY18044  |
| RVX-208  | Apabetalone         | BRD4 bromodomain 2        | Bromo           | Cambridge Bioscience | CAY16424  |
| ZL1580   |                     | BRD4 bromodomain 1        | Bromo           | Cambridge Bioscience | HY-126428 |
| KL-2     |                     | SEC                       | SECI            | Sigma Aldrich        | SML2538   |

(Bromo, bromodomain; CDK9, cyclin dependent kinase 9; HAT, histone acetyltransferase; HDAC, histone acetyltransferase; HDM, histone demethylase; HMT, histone methyltransferase; N/A, not applicable; PRC, polycomb repressive complex; SEC, super-elongation complex.)

**Table S2.** HCMV latently infected CD14+ monocyte RNA-seq data: HCMV transcript fold-change levels.

| HCMV gene*        | Mean fold-change vs DMSO |        |      | From: (13)                                                             | From: (14)                       |
|-------------------|--------------------------|--------|------|------------------------------------------------------------------------|----------------------------------|
|                   | CHR-4487                 | GSK726 | PMA  | Protein function                                                       | Temporal expression profile (Tp) |
| UL32              | 4.72                     | 10.37  | 1.64 | tegument protein pp150                                                 | Tp5                              |
| UL53              | 1.11                     | 6.56   | 0.64 | nuclear egress lamina protein                                          | Tp5                              |
| RL1               | 1.78                     | 4.73   | 1.50 | unknown                                                                | Tp3                              |
| UL73              | 2.55                     | 3.36   | 0.88 | envelope glycoprotein N                                                | Tp5                              |
| between_US34A_RL1 | 1.86                     | 3.24   | 0.68 | RNA                                                                    | N/A                              |
| anti_UL38         | 1.14                     | 2.70   | 1.36 | antisense RNA                                                          | N/A                              |
| anti_UL59         | 2.91                     | 2.65   | 2.55 | antisense RNA                                                          | N/A                              |
| UL89_P1_P2_UL90   | 0.50                     | 2.55   | 2.12 | terminase ATPase subunit                                               | Tp5                              |
| UL100             | 1.30                     | 2.41   | 1.03 | envelope glycoprotein M                                                | Tp5                              |
| anti_UL44.1       | 1.33                     | 2.30   | 0.63 | antisense RNA                                                          | N/A                              |
| UL95              | 1.31                     | 2.27   | 1.59 | tegument protein                                                       | Tp3                              |
| UL30              | 1.72                     | 2.21   | 0.73 | latency?                                                               | Tp5                              |
| RNA4.9            | 1.11                     | 2.07   | 0.73 | lncRNA                                                                 | N/A                              |
| UL72              | 1.98                     | 1.90   | 0.79 | tegument protein                                                       | Tp3                              |
| RNA2.7            | 1.65                     | 1.87   | 1.08 | lncRNA                                                                 | N/A                              |
| US24              | 1.36                     | 1.82   | 1.39 | tegument protein                                                       | Tp1                              |
| RNA5.0            | 1.49                     | 1.81   | 0.76 | lncRNA                                                                 | N/A                              |
| UL71              | 0.93                     | 1.61   | 0.85 | tegument protein                                                       | Tp3                              |
| UL99              | 1.26                     | 1.59   | 1.22 | myristylated tegument protein pp28                                     | Tp5                              |
| anti_US17_US18    | 1.88                     | 1.57   | 0.94 | antisense RNA                                                          | N/A                              |
| UL69              | 0.93                     | 1.56   | 1.00 | deoxyuridine triphosphatase                                            | Tp3                              |
| anti_RNA2.7       | 0.86                     | 1.49   | 1.11 | antisense RNA                                                          | N/A                              |
| UL82              | 1.55                     | 1.47   | 0.90 | tegument protein pp71                                                  | Tp5                              |
| UL40              | 1.23                     | 1.45   | 0.96 | membrane glycoprotein                                                  | Tp3                              |
| UL75              | 1.11                     | 1.44   | 1.02 | envelope glycoprotein H                                                | Tp5                              |
| US26              | 0.97                     | 1.38   | 2.13 | unknown                                                                | Tp3                              |
| anti_UL83         | 1.24                     | 1.34   | 0.73 | antisense RNA                                                          | N/A                              |
| UL48              | 0.70                     | 1.32   | 0.58 | large tegument protein                                                 | Tp5                              |
| UL141             | 1.60                     | 1.31   | 0.83 | membrane glycoprotein                                                  | Tp5                              |
| UL114             | 1.11                     | 1.28   | 1.62 | uracil-DNA glycosylase                                                 | Tp2                              |
| UL115             | 0.84                     | 1.27   | 1.18 | envelope glycoprotein L                                                | Tp5                              |
| UL55              | 0.71                     | 1.26   | 0.83 | envelope glycoprotein B                                                | Tp5                              |
| anti_TRS1         | 1.06                     | 1.25   | 0.26 | antisense RNA                                                          | N/A                              |
| anti_UL87         | 0.60                     | 1.23   | 1.03 | antisense RNA                                                          | N/A                              |
| UL80_UL80.5       | 0.79                     | 1.22   | 0.91 | capsid maturation protease                                             | Tp3                              |
| RL10_RL13/TRL14   | 2.32                     | 1.18   | 2.19 | glycoprotein                                                           | Tp5                              |
| anti_UL69_UL70    | 1.85                     | 1.14   | 0.99 | antisense RNA                                                          | N/A                              |
| RNA_1.2           | 0.85                     | 1.13   | 1.56 | lncRNA                                                                 | N/A                              |
| UL25              | 0.78                     | 1.11   | 0.64 | tegument protein                                                       | Tp5                              |
| UL31              | 1.60                     | 1.10   | 1.20 | phosphoprotein                                                         | Tp5                              |
| UL_74.5           | 1.51                     | 1.09   | 0.85 | unknown                                                                | Tp5                              |
| anti_UL138        | 0.96                     | 1.06   | 1.93 | antisense RNA                                                          | N/A                              |
| UL124             | 0.81                     | 1.04   | 0.65 | membrane glycoprotein                                                  | Tp3                              |
| UL48A             | 1.03                     | 1.02   | 0.80 | small capsid protein                                                   | Tp5                              |
| UL145             | 1.53                     | 1.01   | 1.68 | degradation protein                                                    | Tp3                              |
| UL84              | 1.48                     | 0.99   | 0.77 | DNA replication protein                                                | Tp5                              |
| anti_UL29         | 0.87                     | 0.99   | 0.69 | antisense RNA                                                          | N/A                              |
| UL94              | 0.89                     | 0.99   | 0.88 | tegument protein                                                       | Tp5                              |
| US28              | 1.43                     | 0.98   | 1.81 | membrane protein / GPCR / transcription regulator / latency associated | Tp4                              |
| UL103             | 1.31                     | 0.98   | 1.14 | tegument protein                                                       | Tp3                              |
| UL26              | 0.92                     | 0.97   | 1.37 | tegument protein                                                       | Tp5                              |
| UL54              | 1.01                     | 0.93   | 1.18 | DNA polymerase catalytic subunit                                       | Tp2                              |
| US30              | 0.72                     | 0.91   | 0.95 | membrane protein                                                       | Tp4                              |

|                           |      |      |      |                                                          |         |
|---------------------------|------|------|------|----------------------------------------------------------|---------|
| anti_US21_US22            | 0.70 | 0.91 | 0.78 | antisense RNA                                            | N/A     |
| UL102                     | 0.97 | 0.90 | 1.17 | DNA helicase-primase subunit                             | Tp3     |
| UL16_UL17                 | 0.96 | 0.87 | 0.75 | immunomodulation                                         | Tp2_Tp4 |
| UL123                     | 0.83 | 0.86 | 2.40 | regulatory protein IE1 / IE72                            | Tp1     |
| UL96                      | 1.09 | 0.83 | 1.88 | tegument protein                                         | ND      |
| UL14_UL15A                | 0.88 | 0.82 | 0.95 | membrane protein/glycoprotein                            | Tp2_Tp3 |
| UL22A_P1_P2               | 0.82 | 0.82 | 0.70 | secreted glycoprotein                                    | Tp5     |
| UL42                      | 0.77 | 0.82 | 0.90 | putative membrane protein                                | ND      |
| US32                      | 0.79 | 0.79 | 0.82 | unknown                                                  | ND      |
| anti_UL150                | 1.01 | 0.77 | 0.92 | antisense RNA                                            | N/A     |
| anti_UL111A               | 0.80 | 0.74 | 0.74 | antisense RNA                                            | N/A     |
| UL128                     | 1.01 | 0.71 | 0.84 | putative secreted protein / envelope protein             | ND      |
| UL13                      | 0.72 | 0.70 | 1.59 | putative secreted protein                                | Tp1     |
| UL138                     | 0.85 | 0.68 | 1.23 | latency-associated protein                               | Tp1     |
| UL78                      | 1.01 | 0.65 | 1.24 | immunomodulation / GPCR                                  | Tp2     |
| US18                      | 0.92 | 0.63 | 1.27 | putative multiple transmembrane protein                  | ND      |
| UL4_UL5                   | 0.73 | 0.60 | 2.46 | glycoprotein                                             | Tp5     |
| between_UL124_UL126p      | 0.31 | 0.59 | 0.61 | RNA                                                      | N/A     |
| US12                      | 0.76 | 0.58 | 1.31 | utative multiple transmembrane protein                   | Tp2     |
| anti_UL144_UL145          | 1.12 | 0.55 | 0.60 | antisense RNA                                            | N/A     |
| UL21.5                    | 1.02 | 0.54 | 1.14 | immunomodulation / DNA synthesis / cell cycle modulation | ND      |
| UL36_P1_P2                | 0.72 | 0.54 | 1.05 | tegument protein vICA / apoptosis / DNA replication      | Tp2     |
| UL105                     | 0.64 | 0.50 | 1.15 | helicase-primase helicase subunit / DNA replication      | Tp3     |
| TRS1                      | 0.88 | 0.49 | 1.08 | tegument protein / DNA replication                       | Tp4     |
| UL112                     | 0.71 | 0.48 | 1.35 | DNA replication / transcription activator                | Tp5     |
| UL23                      | 0.99 | 0.47 | 1.06 | tegument protein                                         | Tp3     |
| US34_US34A                | 0.81 | 0.47 | 1.40 | membrane / secreted protein                              | ND      |
| UL34                      | 0.51 | 0.47 | 0.50 | transcription activator                                  | Tp3     |
| UL132                     | 0.81 | 0.42 | 1.02 | envelope glycoprotein                                    | Tp5     |
| UL35                      | 0.73 | 0.41 | 0.82 | tegument protein                                         | Tp5     |
| US22                      | 0.69 | 0.41 | 1.14 | tegument protein                                         | Tp3     |
| UL122                     | 0.61 | 0.39 | 0.84 | regulatory protein IE2 / IE86                            | Tp1     |
| US8                       | 0.68 | 0.37 | 0.76 | membrane glycoprotein / immunomodulation                 | Tp3     |
| UL20                      | 0.77 | 0.35 | 0.96 | transmembrane protein                                    | ND      |
| UL18                      | 0.68 | 0.33 | 0.70 | membrane glycoprotein / immunomodulation                 | ND      |
| anti_UL23                 | 1.03 | 0.32 | 0.64 | antisense RNA                                            | N/A     |
| US10                      | 0.89 | 0.31 | 1.77 | membrane glycoprotein / immunomodulation                 | Tp2     |
| UL38                      | 0.40 | 0.22 | 0.41 | glycoprotein                                             | Tp2     |
| UL6_UL7_UL8_UL9_UL10_UL11 | 0.55 | 0.19 | 2.13 | various / immunomodulation                               | Various |
| UL133                     | 0.15 | 0.16 | 0.23 | putative membrane protein / latency                      | Tp2     |

(ND = not determined; N/A = not applicable.)

HCMV gene - \*asterisk colours as per heatmap in Fig. 3F:

|                          |
|--------------------------|
| Structural protein       |
| Long non-coding RNA      |
| Immunomodulatory protein |
| DNA replication protein  |

**Table S3.** Primers and conditions of use for qPCR.

| Oligo name               | Oligo sequence (5' to 3') | Protocol                              | Design Reference |
|--------------------------|---------------------------|---------------------------------------|------------------|
| GAPDH sense              | TGCACCACCAACTGCTTAGC      | RT-qPCR                               | 15               |
| GAPDH antisense          | GGCATGGACTGTGGTCATGAG     |                                       |                  |
| IE72 sense               | GTCCTGACAGAACTCGTCAAA     | RT-qPCR                               | 16               |
| IEexon4 antisense        | TAAAGGCGCCAGTGAATTTTTCTTC |                                       |                  |
| UL44 sense               | TACAACAGCGTGTCTGTCTCCG    | RT-qPCR                               | 17               |
| UL44 antisense           | GGCGTAAAAAACATGCGTATCAAC  |                                       |                  |
| UL83/pp65 sense          | GGGACACAACACCGTAAAGCCG    | RT-qPCR                               | 17               |
| UL83/pp65 antisense      | CGTGGAAGAGGACCTGACGATGAC  |                                       |                  |
| UL138 sense              | ACGACGAAGACGATGAACCC      | RT-qPCR                               | In house         |
| UL138 antisense          | CCCGATGAGATCTTGGTCCG      |                                       |                  |
| US2 sense                | AGCACACGAAAAACCGCATC      | RT-qPCR                               | 16               |
| US2 antisense            | TGCGGAAGTCATACACGCAT      |                                       |                  |
| US3 sense                | ACCGTGGATATGGTGGACAT      | RT-qPCR                               | 18               |
| US3 antisense            | AACAGCAGACCCCAATTGTC      |                                       |                  |
| US6 sense                | ATCTGCATCTGTGCAGTCCC      | RT-qPCR                               | 16               |
| US6 antisense            | TTCTCTCTCTGTCTCCGCGA      |                                       |                  |
| US11 sense               | TACTCCGAAACATCGGGCAG      | RT-qPCR                               | 16               |
| US11 antisense           | CGCGGGTAGTATGCCTGAAT      |                                       |                  |
| BCL2 sense               | AGTACCTGAACCGGCACCT       | RT-qPCR                               | 19               |
| BCL2 antisense           | CAGCCAGGAGAAATCAAACAG     |                                       |                  |
| FTL sense                | CAGCCTGGTCAATTTGTACCT     | RT-qPCR                               | 19               |
| FTL antisense            | GCCAATTCGCGGAAGAAGTG      |                                       |                  |
| $\beta$ 2Mprom sense     | CGGGCTCTGCTTCCCTTAGACT    | ChIP-qPCR                             | 19               |
| $\beta$ 2Mprom antisense | TGCTAGGACATGCGAACTTAGC    |                                       |                  |
| GAPDHprom sense          | CGGCTACTAGCGGTTTTACG      | ChIP-qPCR & gDNA quantification       | 20               |
| GAPDHprom antisense      | AAGAAGATGCGGCTGACTGT      |                                       |                  |
| gB sense                 | GAGGACAACGAAATCCTGTTGGGCA | Natural HCMV gDNA quantification      | 21               |
| gB antisense             | GTCGACGGTGGAGATACTGCTGAGG |                                       |                  |
| MIEP sense               | CCAAGTCTCCACCCATTGAC      | ChIP-qPCR                             | 22               |
| MIEP antisense           | GACATTTTGGAAAGTCCCGTTG    |                                       |                  |
| MYCprom sense            | GAGCAGCAGAGAAAGGGAGA      | ChIP-qPCR                             | 19               |
| MYCprom antisense        | CAGCCGAGCACTCTAGCTCT      |                                       |                  |
| UL44prom sense           | AACCTGAGCGTGTGTTGTG       | Experimental HCMV gDNA quantification | 23               |
| UL44prom antisense       | CGTGCAAGTCTCGACTAAG       |                                       |                  |

Conditions used: 95°C for 60sec; 40 cycles of 95°C for 15sec, 60°C for 30sec (read); followed by melt curve analysis from 60°C to 95°C to confirm product specific amplification.



**Table S4.** Antibodies and conditions of use for chromatin immunoprecipitation, immunofluorescence, immunoblot analysis and cell phenotyping.

| Target                             | Supplier                   | Cat. No.  | Protocol | Clone    | Isotype | Fluorophore | Volume/Mass/Dilution |
|------------------------------------|----------------------------|-----------|----------|----------|---------|-------------|----------------------|
| H4ac                               | Active Motif               | 39925     | ChIP     |          |         |             | 5 µg                 |
| IgG Rabbit                         | Abcam                      | ab171870  | ChIP     |          |         |             | Variable             |
| IgG Rat                            | Diagenode                  | C15420001 | ChIP     |          |         |             | Variable             |
| CDK9                               | Abcam                      | ab239364  | IB       |          |         |             | 0.6 mg/ml            |
|                                    |                            |           | ChIP     |          |         |             | 5 µg                 |
|                                    |                            |           | IF       |          |         |             | 6 µg/ml              |
| BRD4                               | Active Motif               | 39909     | ChIP     |          |         |             | 4.2 µg               |
|                                    |                            |           | IB       |          |         |             | 1:1,000              |
| Histone H4(pan)                    | Bio-Rad                    | AHP413    | IB       |          |         |             | 1:1,000              |
| RNAPII Ser2P                       | Active Motif               | 61083     | ChIP     |          |         |             | 10 µg                |
| β-Actin                            | Abcam                      | ab8227    | IB       |          |         |             | 1 mg/ml              |
| IE72/IE1                           | Argene                     | 11-003    | IB       |          |         |             | 1:500                |
| UL44                               | Virusys                    | 10D8      | IB       |          |         |             | 1:5,000              |
| pp65/UL83                          | Santa Cruz                 | sc-56976  | IB       |          |         |             | 0.1 µg/ml            |
| Anti-Rabbit IgG 488                | Abcam                      | ab150077  | IF       |          |         |             | 2 µg/ml              |
| Anti-Rabbit IgG HRP                | Santa Cruz                 | sc-2357   | IB       |          |         |             | 0.2 µg/ml            |
| Anti-Mouse IgG HRP                 | Cell Signalling Technology | 7076      | IB       |          |         |             | 1:2,000              |
| Normal mouse serum                 | Invitrogen                 | 01-6501   | FC       |          |         |             | 1:50                 |
| TruStain FcX                       | Biologend                  | 422302    | FC       |          |         |             | 5 µl                 |
| TruStain Monocyte Blocker          | Biologend                  | 426103    | FC       |          |         |             | 5 µl                 |
| Live Dead stain                    | Thermofisher               | L34966    | FC       |          |         | Aqua        | 2.5 µl               |
| HLA DR                             | Biologend                  | 307636    | FC       | L243     | IgG2ak  | BV421       | 2 µl                 |
| CD14                               | Biologend                  | 301824    | FC       | M5E2     | IgG2ak  | PerCP-Cy5.5 | 3 µl                 |
| CD80                               | Biologend                  | 305210    | FC       | 2D10     | IgG1κ   | PE-Cy5      | 4 µl                 |
| CD86                               | Biologend                  | 305422    | FC       | IT2.2    | IgG2bk  | PE-Cy7      | 3 µl                 |
| CD209                              | Biologend                  | 330108    | FC       | 9E9A8    | IgG2ak  | APC         | 3 µl                 |
| HLA ABC                            | Biologend                  | 311438    | FC       | W6/32    | IgG2ak  | AF700       | 3 µl                 |
| IgG2ak-BV421 isotype control       | Biologend                  | 400260    | FC       | MOPC-173 | IgG2ak  | BV421       | 2 µl                 |
| IgG2ak-PerCP-Cy5.5 isotype control | Biologend                  | 400251    | FC       | MOPC-173 | IgG2ak  | PerCP-Cy5.5 | 3 µl                 |
| IgG1κ-PE-Cy5 isotype control       | Biologend                  | 400118    | FC       | MOPC-21  | IgG1κ   | PE-Cy5      | 4 µl                 |
| IgG2bk-PE-Cy7 isotype control      | Biologend                  | 400326    | FC       | MPC-11   | IgG2bk  | PE-Cy7      | 3 µl                 |
| IgG2ak-APC isotype control         | Biologend                  | 400222    | FC       | MOPC-173 | IgG2ak  | APC         | 3 µl                 |
| IgG2ak-AF700 isotype control       | Biologend                  | 400248    | FC       | MOPC-173 | IgG2ak  | AF700       | 3 µl                 |
| CD56                               | Biologend                  | 318327    | FC       | HCD56    | IgG1κ   | BV421       | 3 µl                 |
| CD4                                | Biologend                  | 317438    | FC       | OKT4     | IgG1κ   | BV605       | 2.5 µl               |
| CD3                                | Biologend                  | 300406    | FC       | UCHT1    | IgG1κ   | FITC        | 2 µl                 |
| CD8                                | Biologend                  | 301032    | FC       | RPA-T8   | IgG1κ   | PerCP-Cy5.5 | 2 µl                 |
| TCR gamma delta                    | Biologend                  | 331209    | FC       | B1       | IgG1κ   | PE          | 3 µl                 |
| TCR alpha beta                     | Biologend                  | 306717    | FC       | IP26     | IgG1κ   | APC         | 3 µl                 |

(ChIP = chromatin immunoprecipitation; IB = immunoblot; IF = immunofluorescence; FC = flow cytometry.)

## Supplementary References

1. D. Zhu et al., Human cytomegalovirus reprogrammes haematopoietic progenitor cells into immunosuppressive monocytes to achieve latency. *Nat Microbiol* 3, 503-513 (2018).
2. E. Van Damme et al., Glucocorticosteroids trigger reactivation of human cytomegalovirus from latently infected myeloid cells and increase the risk for HCMV infection in D+R+ liver transplant patients. *J Gen Virol* 96, 131-143 (2015).
3. C. M. O'Connor, E. A. Murphy, A myeloid progenitor cell line capable of supporting human cytomegalovirus latency and reactivation, resulting in infectious progeny. *J Virol* 86, 9854-9865 (2012).
4. E. Poole, J. C. H. Lau, J. Sinclair, Latent infection of myeloid progenitors by human cytomegalovirus protects cells from FAS-mediated apoptosis through the cellular IL-10/PEA-15 pathway. *J Gen Virol* 96, 2355-2359 (2015).
5. E. Poole et al., An iPSC-Derived Myeloid Lineage Model of Herpes Virus Latency and Reactivation. *Front Microbiol* 10, 2233 (2019).
6. S. Straschewski et al., Human cytomegaloviruses expressing yellow fluorescent fusion proteins--characterization and use in antiviral screening. *PLoS One* 5, e9174 (2010).
7. C. Sinzger et al., Modification of human cytomegalovirus tropism through propagation in vitro is associated with changes in the viral genome. *J Gen Virol* 80 ( Pt 11), 2867-2877 840 (1999).
8. K. L. Sampaio, Y. Cavnac, Y. D. Stierhof, C. Sinzger, Human cytomegalovirus labeled with green fluorescent protein for live analysis of intracellular particle movements. *J Virol* 79, 2754-2767 (2005).
9. S. E. Jackson et al., Latent Cytomegalovirus (CMV) Infection Does Not Detrimentally Alter T Cell Responses in the Healthy Old, But Increased Latent CMV Carriage Is Related to Expanded CMV-Specific T Cells. *Front Immunol* 8, 733 (2017).
10. M. W. Pfaffl, A new mathematical model for relative quantification in real-time RT-PCR. *Nucleic Acids Res* 29, e45 (2001).
11. H. M. Parry et al., Cytomegalovirus viral load within blood increases markedly in healthy people over the age of 70 years. *Immun Ageing* 13, 1 (2016).
12. H. Keren-Shaul et al., MARS-seq2.0: an experimental and analytical pipeline for indexed sorting combined with single-cell RNA sequencing. *Nat Protoc* 14, 1841-1862 (2019).
13. E. Van Damme, M. Van Loock, Functional annotation of human cytomegalovirus gene products: an update. *Front Microbiol* 5, 218 (2014).
14. K. Nightingale et al., High-Definition Analysis of Host Protein Stability during Human Cytomegalovirus Infection Reveals Antiviral Factors and Viral Evasion Mechanisms. *Cell Host Microbe* 24, 447-460.e411 (2018).
15. J. Vandesompele et al., Accurate normalization of real-time quantitative RT-PCR data by geometric averaging of multiple internal control genes. *Genome Biol* 3, RESEARCH0034 (2002).
16. L. Shan et al., Killer cell proteases can target viral immediate-early proteins to control human cytomegalovirus infection in a noncytotoxic manner. *PLoS Pathog* 16, e1008426 (2020).
17. S. Omoto, E. S. Mocarski, Cytomegalovirus UL91 is essential for transcription of viral true late ( $\gamma$ 2) genes. *J Virol* 87, 8651-8664 (2013).
18. A. K. L. Cheung, Y. Huang, H. Y. Kwok, M. Chen, Z. Chen, Latent human cytomegalovirus enhances HIV-1 infection in CD34. *Blood Adv* 1, 306-318 (2017).
19. M. A. Dawson et al., Inhibition of BET recruitment to chromatin as an effective treatment for MLL-fusion leukaemia. *Nature* 478, 529-533 (2011).

20. H. M. Coleman et al., Histone modifications associated with herpes simplex virus type 1 genomes during quiescence and following ICP0-mediated de-repression. *J Gen Virol* 89, 68-77 (2008).
21. C. M. Mastroianni et al., Cytomegalovirus encephalitis in two patients with AIDS receiving ganciclovir for cytomegalovirus retinitis. *J Infect* 29, 331-337 (1994).
22. I. J. Groves, J. H. Sinclair, Knockdown of hDaxx in normally non-permissive undifferentiated cells does not permit human cytomegalovirus immediate-early gene expression. *J Gen Virol* 88, 2935-2940 (2007).
23. M. Nevels, C. Paulus, T. Shenk, Human cytomegalovirus immediate-early 1 protein facilitates viral replication by antagonizing histone deacetylation. *Proc Natl Acad Sci U S A* 101, 17234-17239 (2004).
